# Supplementary material
Source: PubMed Central journal article supplement (PMC7271383)

## **Anti-inflammatory withanolides from *physalis minima***

Jiangping Wu,<sup>†</sup> Tao Zhang,<sup>†</sup> Meng Yu,<sup>†</sup> Hongmei Jia,<sup>†</sup> Hongwu Zhang,<sup>†</sup>

Qiongming Xu,<sup>‡</sup> Yucheng Gu,<sup>\*,§</sup> and Zhongmei Zou<sup>\*,†</sup>

<sup>†</sup>Institute of Medicinal Plant Development, Chinese Academy of Medical Sciences

and Peking Union Medical College, Beijing 100193, China;

<sup>‡</sup>College of Pharmaceutical Science, Soochow University, Suzhou 215123, China;

<sup>§</sup>Syngenta, Jealott's Hill International Research Centre, Berkshire RE42 6EY, UK.

\* Corresponding author: Zhongmei Zou, Yucheng Gu, PhD;

Tel/Fax: 86-1057833290

E-mail address: [zmzou@implad.ac.cn](mailto:zmzou@implad.ac.cn); [yucheng.gu@syngenta.com](mailto:yucheng.gu@syngenta.com)

## Index

| page | contents                                                                                                                                                                                    |
|------|---------------------------------------------------------------------------------------------------------------------------------------------------------------------------------------------|
| S4   | <b>Table S1</b> $^{13}\text{C}$ -NMR (150 MHz) spectroscopic data for compounds <b>6–10</b> in $\text{CD}_3\text{OD}$ .                                                                     |
| S5   | <b>Table S2</b> $^1\text{H}$ -NMR (600 MHz) spectroscopic data for compounds <b>6–10</b> in $\text{CD}_3\text{OD}$ .                                                                        |
| S6   | HR-ESI-MS spectrum of compound <b>1</b> , $^1\text{H}$ NMR spectrum of compound <b>1</b> in $\text{CD}_3\text{OD}$ at 600 MHz.                                                              |
| S7   | Detailed $^1\text{H}$ NMR spectrum of compound <b>1</b> in $\text{CD}_3\text{OD}$ at 600 MHz, Detailed $^1\text{H}$ NMR spectrum of compound <b>1</b> in $\text{CD}_3\text{OD}$ at 600 MHz. |
| S8   | $^{13}\text{C}$ -NMR spectrum of compound <b>1</b> in $\text{CD}_3\text{OD}$ at 150 MHz, Detailed $^{13}\text{C}$ NMR spectrum of compound <b>1</b> in $\text{CD}_3\text{OD}$ at 150 MHz.   |
| S9   | Detailed $^{13}\text{C}$ NMR spectrum of compound <b>1</b> in $\text{CD}_3\text{OD}$ at 150 MHz, HSQC spectrum of compound <b>1</b> in $\text{CD}_3\text{OD}$ .                             |
| S10  | HMBC spectrum of compound <b>1</b> in $\text{CD}_3\text{OD}$ , COSY spectrum of compound <b>1</b> in $\text{CD}_3\text{OD}$ .                                                               |
| S11  | NOESY spectrum of compound <b>1</b> in $\text{CD}_3\text{OD}$ .                                                                                                                             |
| S12  | ECD spectrum of <b>1</b>                                                                                                                                                                    |
| S13  | HR-ESI-MS spectrum of compound <b>2</b> , $^1\text{H}$ NMR spectrum of compound <b>2</b> in $\text{CD}_3\text{OD}$ at 600 MHz.                                                              |
| S14  | Detailed $^1\text{H}$ NMR spectrum of compound <b>2</b> in $\text{CD}_3\text{OD}$ at 600 MHz, Detailed $^1\text{H}$ NMR spectrum of compound <b>2</b> in $\text{CD}_3\text{OD}$ at 600 MHz. |
| S15  | $^{13}\text{C}$ NMR spectrum of compound <b>2</b> in $\text{CD}_3\text{OD}$ at 150 MHz, Detailed $^{13}\text{C}$ NMR spectrum of compound <b>2</b> in $\text{CD}_3\text{OD}$ at 150 MHz.    |
| S16  | Detailed $^{13}\text{C}$ NMR spectrum of compound <b>2</b> in $\text{CD}_3\text{OD}$ at 150 MHz, HSQC spectrum of compound <b>2</b> in $\text{CD}_3\text{OD}$ .                             |
| S17  | HMBC spectrum of compound <b>2</b> in $\text{CD}_3\text{OD}$ , COSY spectrum of compound <b>2</b> in $\text{CD}_3\text{OD}$ .                                                               |
| S18  | NOESY spectrum of compound <b>2</b> in $\text{CD}_3\text{OD}$ .                                                                                                                             |
| S19  | HR-ESI-MS spectrum of compound <b>3</b> , $^1\text{H}$ NMR spectrum of compound <b>3</b> in $\text{CD}_3\text{OD}$ at 600 MHz.                                                              |
| S20  | Detailed $^1\text{H}$ NMR spectrum of compound <b>3</b> in $\text{CD}_3\text{OD}$ at 600 MHz, Detailed $^1\text{H}$ NMR spectrum of compound <b>3</b> in $\text{CD}_3\text{OD}$ at 600 MHz. |

---

|     |                                                                                                                                                                                         |
|-----|-----------------------------------------------------------------------------------------------------------------------------------------------------------------------------------------|
| S21 | <sup>13</sup> C NMR spectrum of compound <b>3</b> in CD <sub>3</sub> OD at 150 MHz, Detailed <sup>13</sup> C NMR spectrum of compound <b>3</b> in CD <sub>3</sub> OD at 150 MHz.        |
| S22 | Detailed <sup>13</sup> C NMR spectrum of compound <b>3</b> in CD <sub>3</sub> OD at 150 MHz, HSQC spectrum of compound <b>3</b> in CD <sub>3</sub> OD.                                  |
| S23 | HMBC spectrum of compound <b>3</b> in CD <sub>3</sub> OD, COSY spectrum of compound <b>3</b> in CD <sub>3</sub> OD.                                                                     |
| S24 | NOESY spectrum of compound <b>3</b> in CD <sub>3</sub> OD.                                                                                                                              |
| S25 | HR-ESI-MS spectrum of compound <b>4</b> , <sup>1</sup> H NMR spectrum of compound <b>4</b> in CD <sub>3</sub> OD at 600 MHz.                                                            |
| S26 | Detailed <sup>1</sup> H NMR spectrum of compound <b>4</b> in CD <sub>3</sub> OD at 600 MHz, Detailed <sup>1</sup> H NMR spectrum of compound <b>4</b> in CD <sub>3</sub> OD at 600 MHz. |
| S27 | <sup>13</sup> C NMR spectrum of compound <b>4</b> in CD <sub>3</sub> OD at 150 MHz, Detailed <sup>13</sup> C NMR spectrum of compound <b>4</b> in CD <sub>3</sub> OD at 150 MHz.        |
| S28 | Detailed <sup>13</sup> C NMR spectrum of compound <b>4</b> in CD <sub>3</sub> OD at 150 MHz, HSQC spectrum of compound <b>4</b> in CD <sub>3</sub> OD.                                  |
| S29 | HMBC spectrum of compound <b>4</b> in CD <sub>3</sub> OD, COSY spectrum of compound <b>4</b> in CD <sub>3</sub> OD.                                                                     |
| S30 | NOESY spectrum of compound <b>4</b> in CD <sub>3</sub> OD.                                                                                                                              |
| S31 | HR-ESI-MS spectrum of compound <b>5</b> , <sup>1</sup> H NMR spectrum of compound <b>5</b> in CD <sub>3</sub> OD at 600 MHz.                                                            |
| S32 | Detailed <sup>1</sup> H NMR spectrum of compound <b>5</b> in CD <sub>3</sub> OD at 600 MHz, Detailed <sup>1</sup> H NMR spectrum of compound <b>5</b> in CD <sub>3</sub> OD at 600 MHz. |
| S33 | <sup>13</sup> C NMR spectrum of compound <b>5</b> in CD <sub>3</sub> OD at 150 MHz, Detailed <sup>13</sup> C NMR spectrum of compound <b>5</b> in CD <sub>3</sub> OD at 125 MHz.        |
| S34 | Detailed <sup>13</sup> C NMR spectrum of compound <b>5</b> in CD <sub>3</sub> OD at 150 MHz, HSQC spectrum of compound <b>5</b> in CD <sub>3</sub> OD.                                  |
| S35 | HMBC spectrum of compound <b>5</b> in CD <sub>3</sub> OD, COSY spectrum of compound <b>5</b> in CD <sub>3</sub> OD.                                                                     |
| S36 | NOESY spectrum of compound <b>5</b> in CD <sub>3</sub> OD.                                                                                                                              |

---

**Table S1**  $^{13}\text{C}$ -NMR (150 MHz) spectroscopic data for compounds **6–10** in  $\text{CD}_3\text{OD}$ .

| NO.                   | 6     | 7     | 8     | 9     | 10    |
|-----------------------|-------|-------|-------|-------|-------|
| 1                     | 210.3 | 212.5 | 204.1 | 205.6 | 206.0 |
| 2                     | 41.3  | 42.2  | 128.7 | 129.6 | 128.7 |
| 3                     | 73.6  | 70.5  | 141.7 | 142.3 | 142.5 |
| 4                     | 36.5  | 78.6  | 36.0  | 37.2  | 37.1  |
| 5                     | 61.5  | 65.4  | 77.2  | 78.5  | 78.1  |
| 6                     | 62.4  | 59.7  | 73.4  | 75.1  | 75.4  |
| 7                     | 25.1  | 26.7  | 26.8  | 28.8  | 30.8  |
| 8                     | 35.7  | 34.8  | 35.4  | 37.5  | 37.7  |
| 9                     | 38.6  | 39.8  | 36.3  | 37.4  | 38.2  |
| 10                    | 52.1  | 52.0  | 52.6  | 52.6  | 52.5  |
| 11                    | 22.2  | 21.8  | 23.2  | 24.1  | 22.9  |
| 12                    | 37.9  | 30.3  | 38.3  | 40.8  | 40.7  |
| 13                    | 52.3  | 55.0  | 52.2  | 53.2  | 54.0  |
| 14                    | 81.3  | 81.2  | 82.4  | 82.4  | 84.0  |
| 15                    | 84.4  | 33.0  | 83.6  | 83.4  | 76.5  |
| 16                    | 122.1 | 37.9  | 120.4 | 127.3 | 127.8 |
| 17                    | 162.6 | 86.7  | 162.2 | 158.9 | 154.6 |
| 18                    | 16.8  | 20.8  | 16.1  | 17.9  | 19.9  |
| 19                    | 14.3  | 15.2  | 15.0  | 16.0  | 16.7  |
| 20                    | 35.0  | 79.3  | 36.1  | 35.5  | 35.2  |
| 21                    | 17.8  | 19.0  | 17.2  | 19.8  | 18.6  |
| 22                    | 78.9  | 81.6  | 78.6  | 79.7  | 79.4  |
| 23                    | 32.1  | 33.9  | 32.4  | 32.9  | 32.7  |
| 24                    | 150.8 | 151.0 | 150.8 | 150.1 | 150.5 |
| 25                    | 121.8 | 121.7 | 121.2 | 122.2 | 122.0 |
| 26                    | 167.7 | 169.6 | 167.4 | 166.8 | 166.7 |
| 27                    | 12.5  | 11.2  | 11.6  | 13.0  | 13.0  |
| 28                    | 19.7  | 20.4  | 20.6  | 18.5  | 20.4  |
| CH <sub>3</sub> CO-1' | 170.1 | -     | 170.6 | -     | -     |
| CH <sub>3</sub> CO-2' | 20.9  | -     | 21.9  | -     | -     |
| OMe                   | 53.7  | -     | -     | -     | -     |

**Table S2** <sup>1</sup>H-NMR (600 MHz) spectroscopic data for compounds **6–10** in CD<sub>3</sub>OD.

| NO.                | 6                                                               | 7                                                               | 8                                                               | 9                                                               | 10                                                              |
|--------------------|-----------------------------------------------------------------|-----------------------------------------------------------------|-----------------------------------------------------------------|-----------------------------------------------------------------|-----------------------------------------------------------------|
| 2                  | $\alpha$ : 2.88 dd (16.2, 3.0)<br>$\beta$ : 2.94 dd (16.2, 7.8) | $\alpha$ : 2.55 dd (15.6, 3.2)<br>$\beta$ : 2.91 dd (15.6, 7.2) | 5.87 dd (10.2, 3.6)                                             | 6.15 dd (10.2, 3.6)                                             | 6.18 dd (10.2, 3.6)                                             |
| 3                  | 3.79 m                                                          | 4.08 m                                                          | 6.57 ddd (10.2, 5.4, 3.6)                                       | 6.67 ddd (10.2, 5.4, 3.6)                                       | 6.69 ddd (10.2, 5.4, 3.6)                                       |
| 4                  | $\alpha$ : 1.68 (br d, 16.2)<br>$\beta$ : 3.66 d (3.0)          | 3.21 d (3.2)                                                    | $\alpha$ : 2.10 dd (10.2, 5.4)<br>$\beta$ : 3.36 dt (16.2, 3.6) | $\alpha$ : 2.45 dd (10.2, 5.4)<br>$\beta$ : 3.76 dt (16.2, 3.6) | $\alpha$ : 2.45 dd (10.2, 5.4)<br>$\beta$ : 3.74 dt (16.2, 3.6) |
| 6                  | 3.40 br s                                                       | 3.30 br s                                                       | 3.60 t (3.6)                                                    | 4.30 br s                                                       | 4.32 br s                                                       |
| 7                  | $\alpha$ : 1.62 m<br>$\beta$ : 2.49 m                           | $\alpha$ : 2.49 m<br>$\beta$ : 2.60 m                           | $\alpha$ : 1.97 m,<br>$\beta$ : 2.21 m                          | $\alpha$ : 2.97 m,<br>$\beta$ : 3.47 m                          | $\alpha$ : 2.77 m,<br>$\beta$ : 3.57 m                          |
| 8                  | 2.59 m                                                          | 2.63 m                                                          | 2.30 m                                                          | 2.86 m                                                          | 2.76 m                                                          |
| 9                  | 1.93 m                                                          | 2.57 m                                                          | 2.12 m                                                          | 3.79 m                                                          | 3.69 m                                                          |
| 11                 | 1.25 m, 1.38 m                                                  | 1.48 m, 1.70 m                                                  | 2.16 m, 2.12 m                                                  | 1.64 m, 2.82 m                                                  | 1.42 m, 2.62 m                                                  |
| 12                 | 1.74 m, 1.47 m                                                  | 1.51 m, 2.21 m                                                  | 1.82 m, 2.31 m                                                  | 1.95 m, 2.34 m                                                  | 1.95 m, 2.34 m                                                  |
| 15                 | 5.82 d (3.0)                                                    | 5.04 d (3.2)                                                    | 5.37 d (2.4)                                                    | 5.10 d (2.4)                                                    | 5.25 d (2.4)                                                    |
| 16                 | 5.78 d (3.0)                                                    | 3.67 m, 3.76 m                                                  | 5.60 d (2.4)                                                    | 6.13 d (2.4)                                                    | 5.71 br s                                                       |
| 18                 | 1.37 s                                                          | 1.21 s                                                          | 1.16 s                                                          | 1.43 s                                                          | 1.39 s                                                          |
| 19                 | 1.35 s                                                          | 1.26 s                                                          | 1.21 s                                                          | 1.72 s                                                          | 1.70 s                                                          |
| 20                 | 2.57 m                                                          | -                                                               | 2.53                                                            | 2.64 m                                                          | 2.62 m                                                          |
| 21                 | 1.21 d (7.2)                                                    | 1.07 s                                                          | 1.12 d (7.2)                                                    | 1.22 d (7.2)                                                    | 1.26 d (7.2)                                                    |
| 22                 | 4.39 dd (12.0, 3.6)                                             | 5.08 dd (12.0, 3.6)                                             | 4.34 dd (12.0, 3.6)                                             | 4.45 dd (12.0, 3.6)                                             | 4.43 dd (12.0, 3.6)                                             |
| 23                 | 2.29 m, 2.59 m                                                  | 1.86 m, 1.96 m                                                  | 2.28 m, 2.39 m                                                  | 2.08 m, 2.49 m                                                  | 2.06 m, 2.52 m                                                  |
| 27                 | 1.84 s                                                          | 1.86 s                                                          | 1.86 s                                                          | 1.85 s                                                          | 1.85 s                                                          |
| 28                 | 1.53 (br s)                                                     | 1.99 s                                                          | 1.99 s                                                          | 1.52 s                                                          | 1.50 s                                                          |
| CH <sub>3</sub> CO | 2.09 s                                                          | 2.10 s                                                          | 2.03 s                                                          | -                                                               | -                                                               |
| OMe                | 3.21 s                                                          | -                                                               | -                                                               | -                                                               | -                                                               |

Chemical shifts are in ppm, and coupling constants (*J*) in Hz are given in parentheses.

# HR-ESI-MS spectrum of compound 1

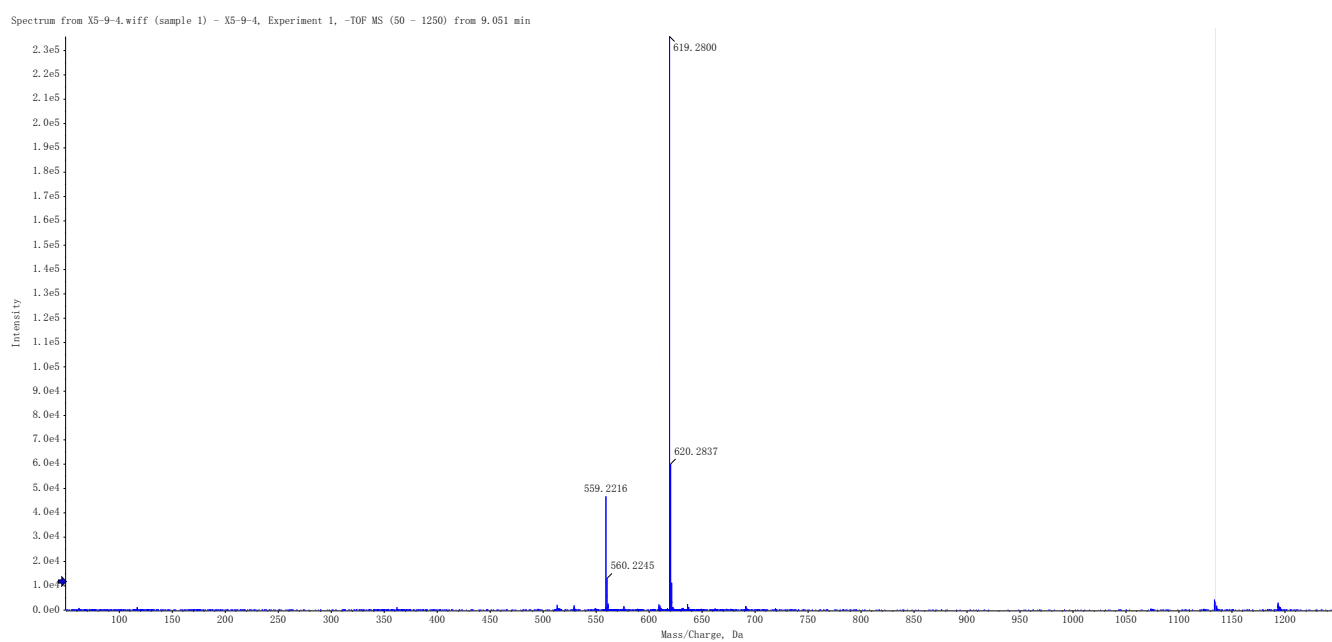

# <sup>1</sup>H NMR spectrum of compound 1 CD<sub>3</sub>OD at 600 MHz

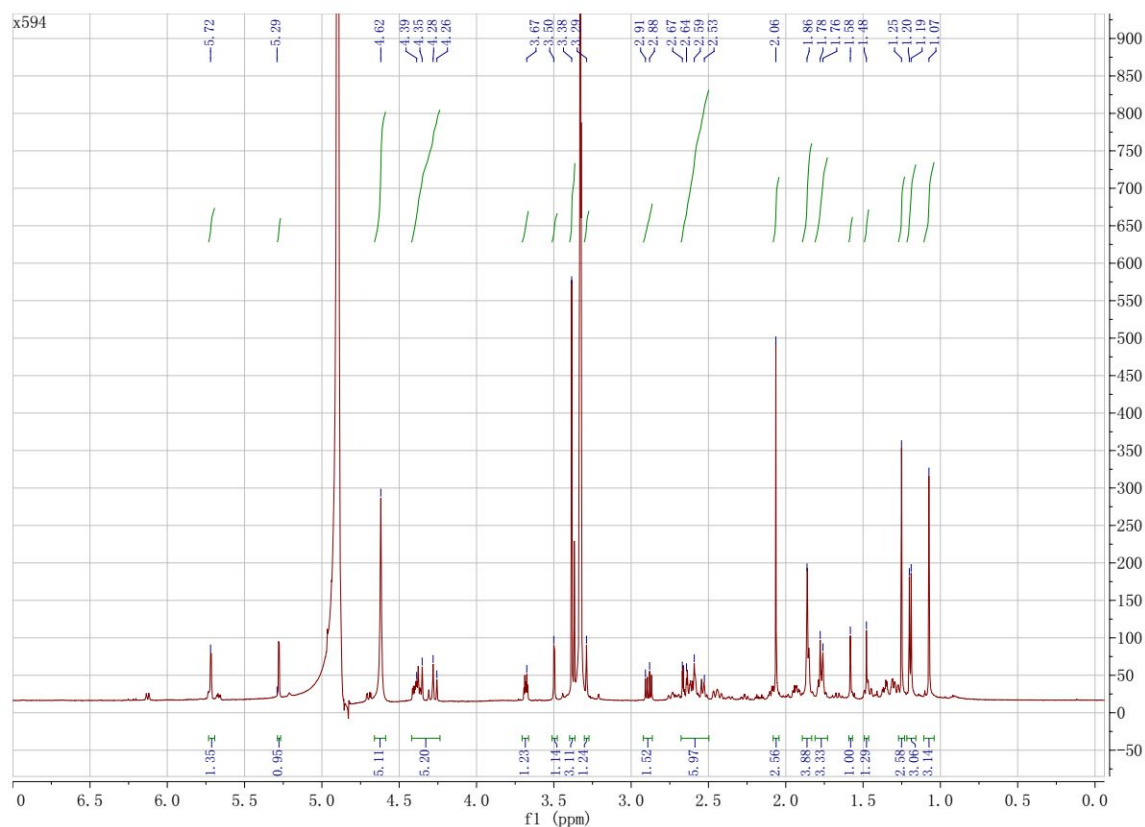

Detailed <sup>1</sup>H NMR spectrum of compound **1** in CD<sub>3</sub>OD at 600 MHz

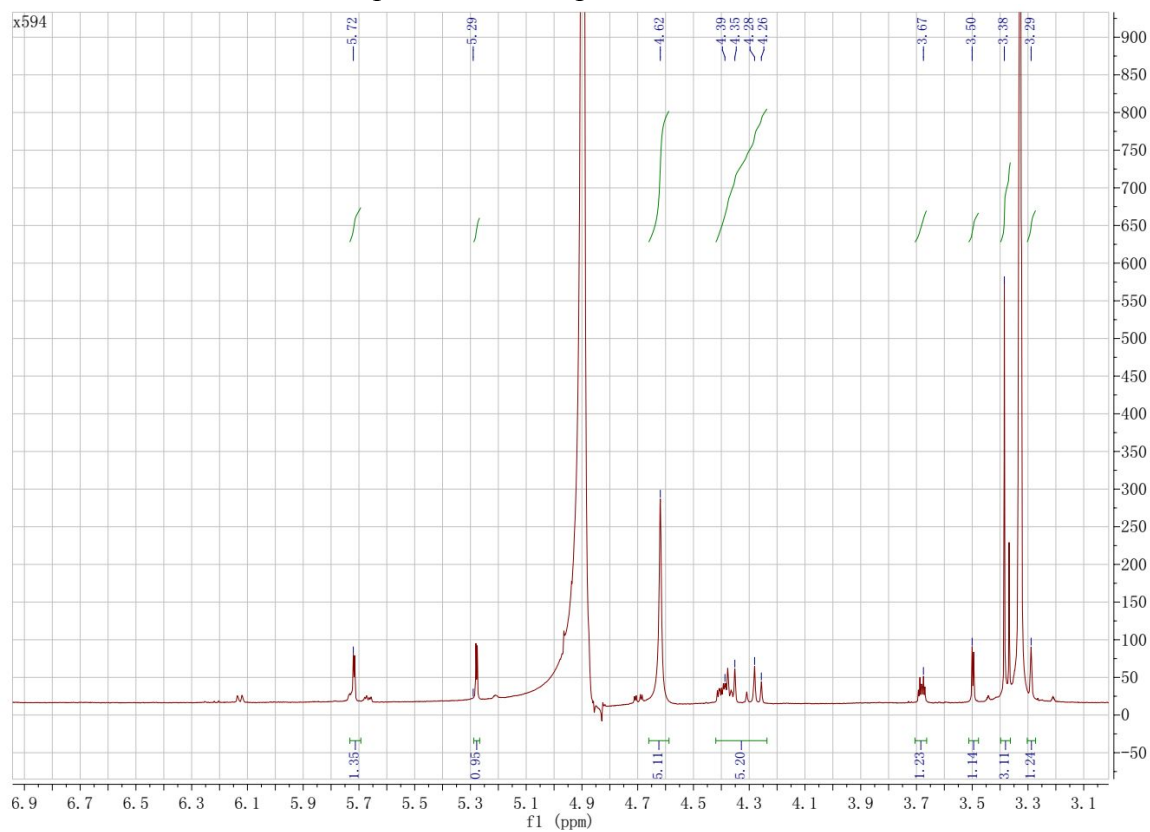

Detailed <sup>1</sup>H NMR spectrum of compound **1** in CD<sub>3</sub>OD at 600 MHz

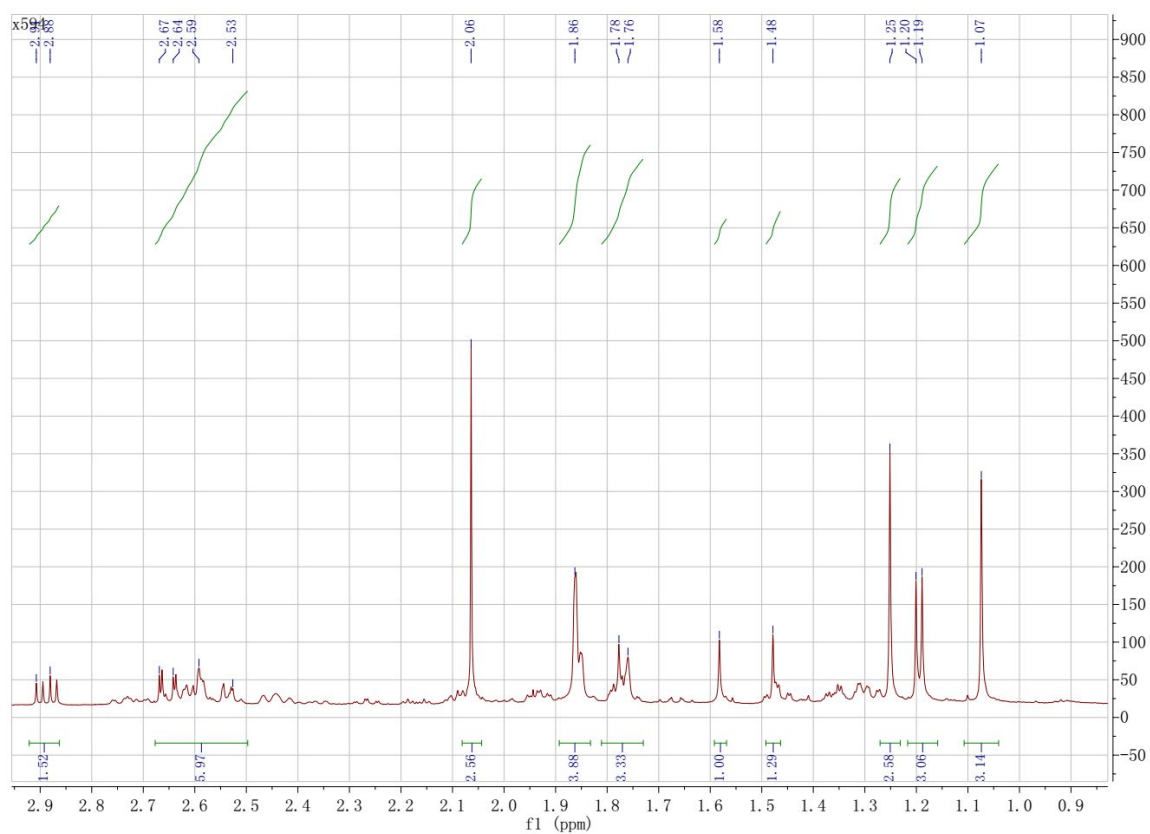

$^{13}\text{C}$  NMR spectrum of compound **1** in  $\text{CD}_3\text{OD}$  at 150 MHz

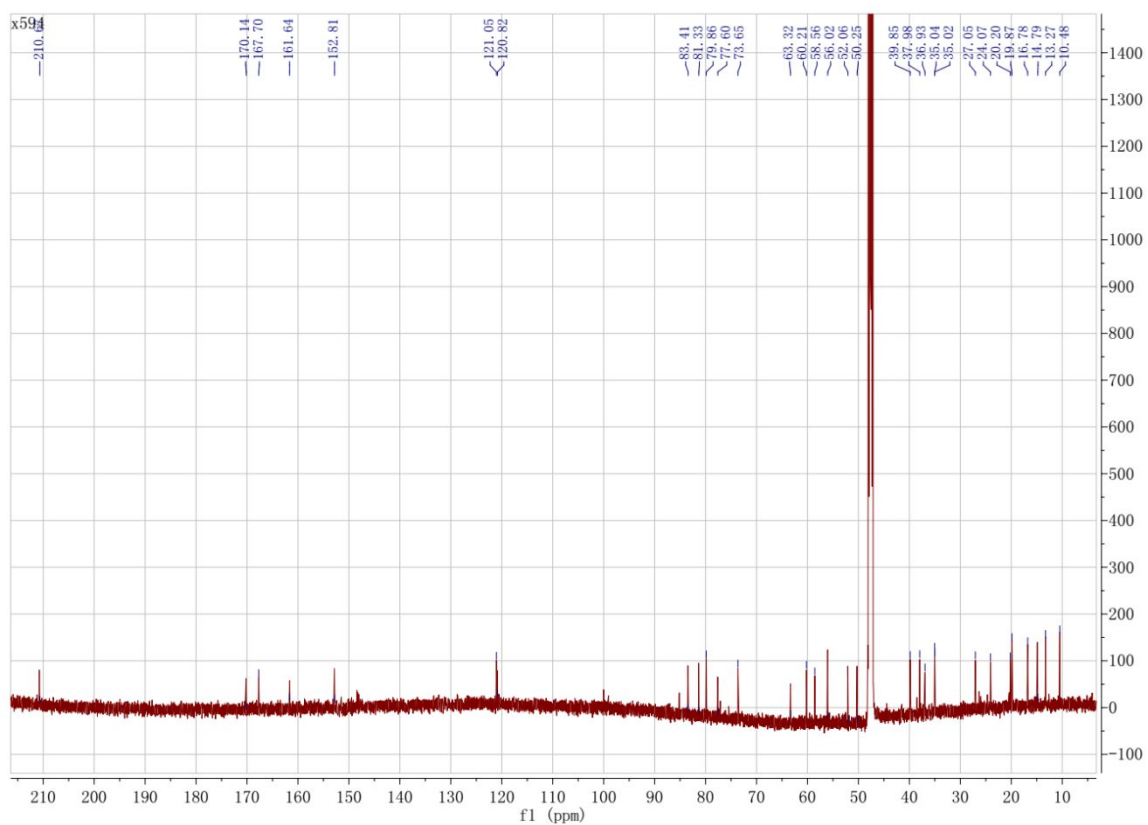

Detailed  $^{13}\text{C}$  NMR spectrum of compound **1** in  $\text{CD}_3\text{OD}$  at 150 MHz

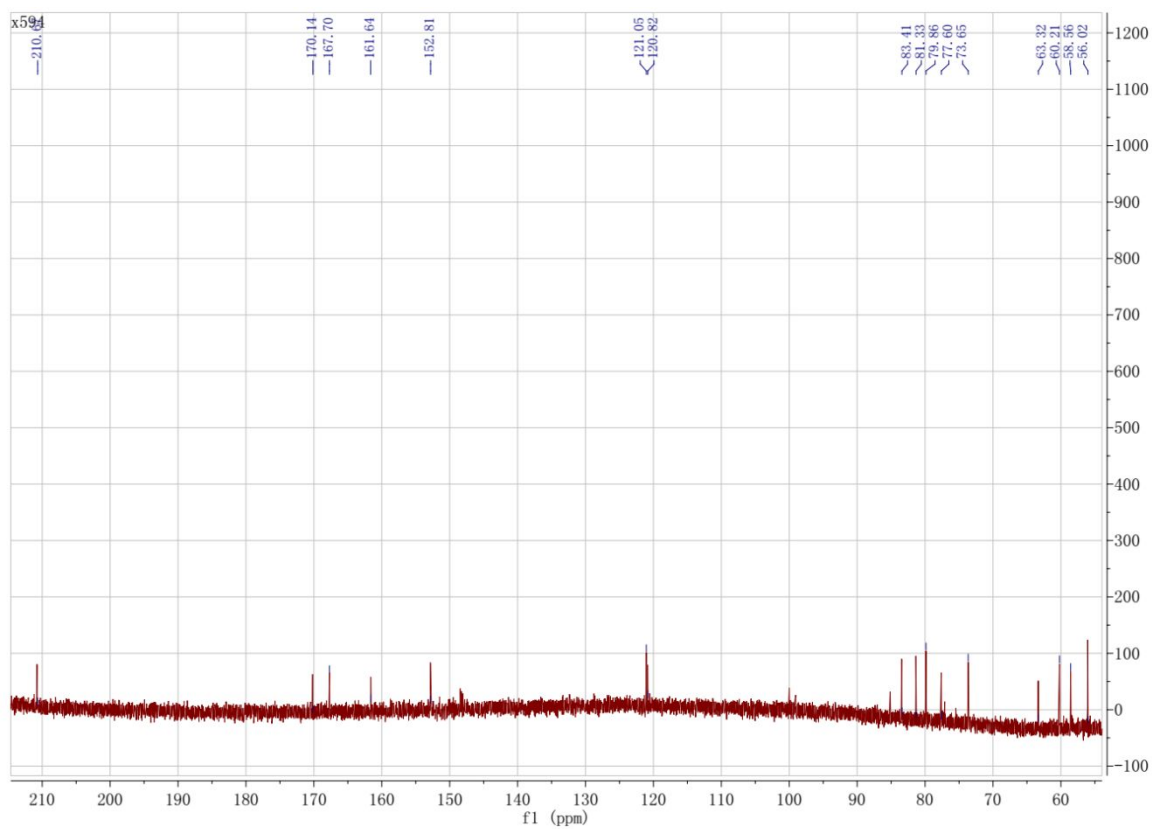



Detailed  $^{13}\text{C}$  NMR spectrum of compound **1** in  $\text{CD}_3\text{OD}$  at 150 MHz

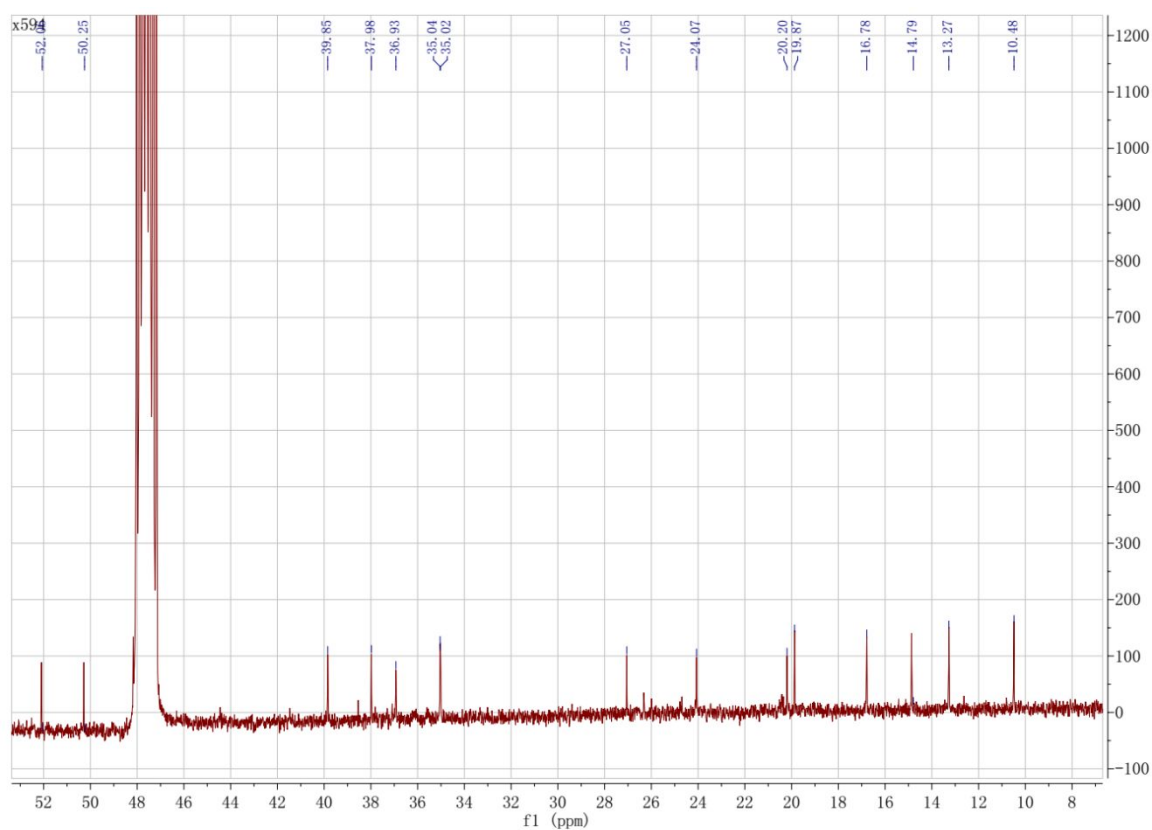

HSQC spectrum of compound **1** in  $\text{CD}_3\text{OD}$

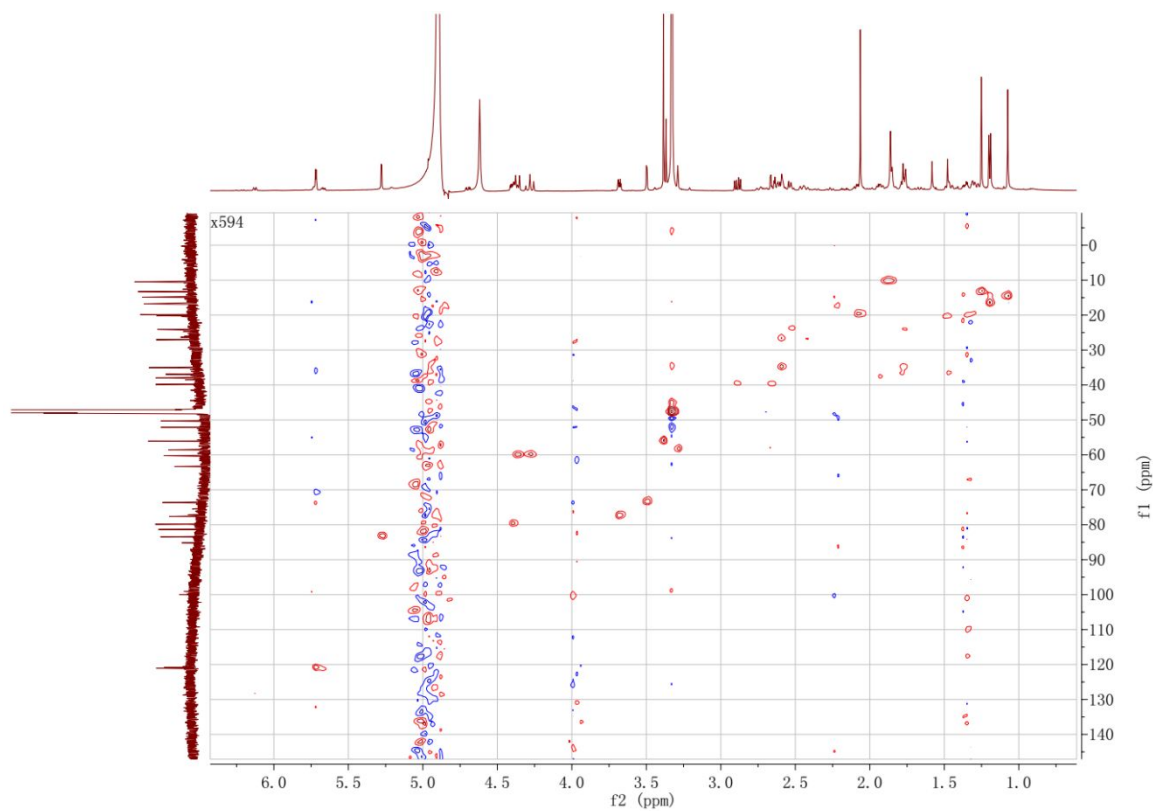

HMBC spectrum of compound **1** in CD<sub>3</sub>OD

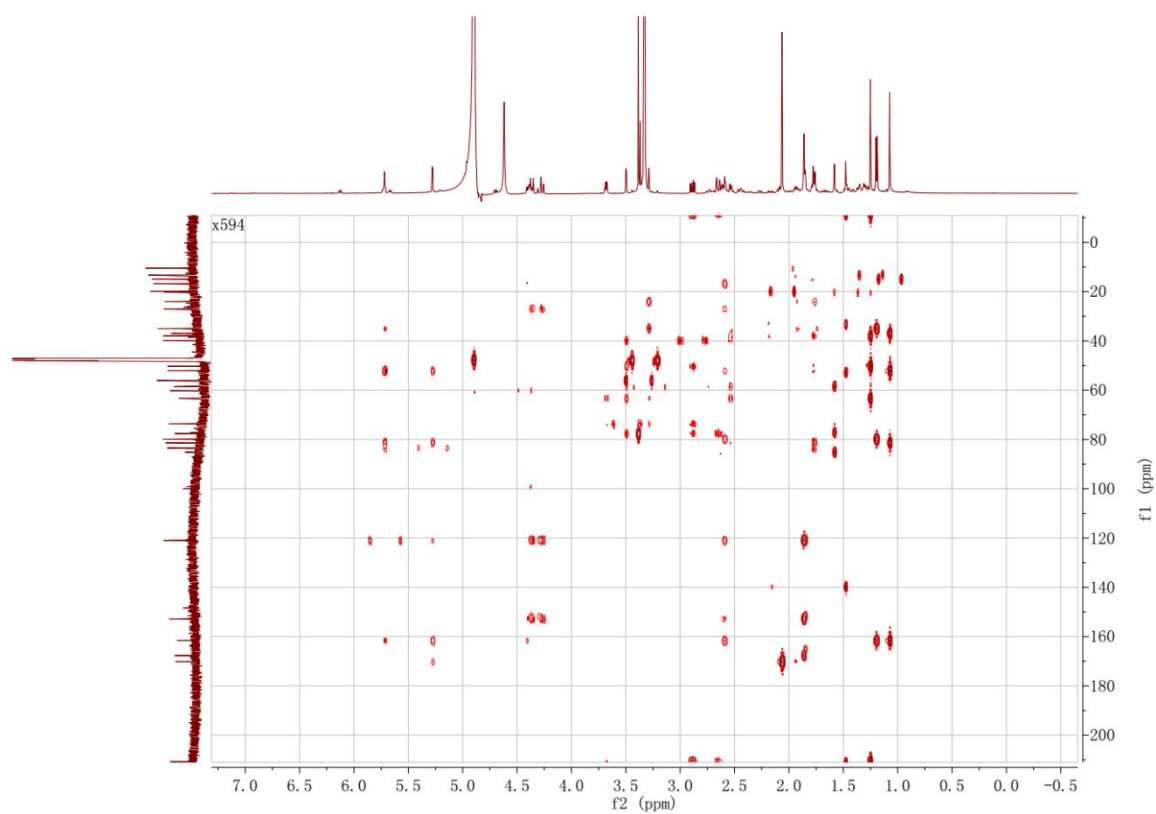

COSY spectrum of compound **1** in CD<sub>3</sub>OD

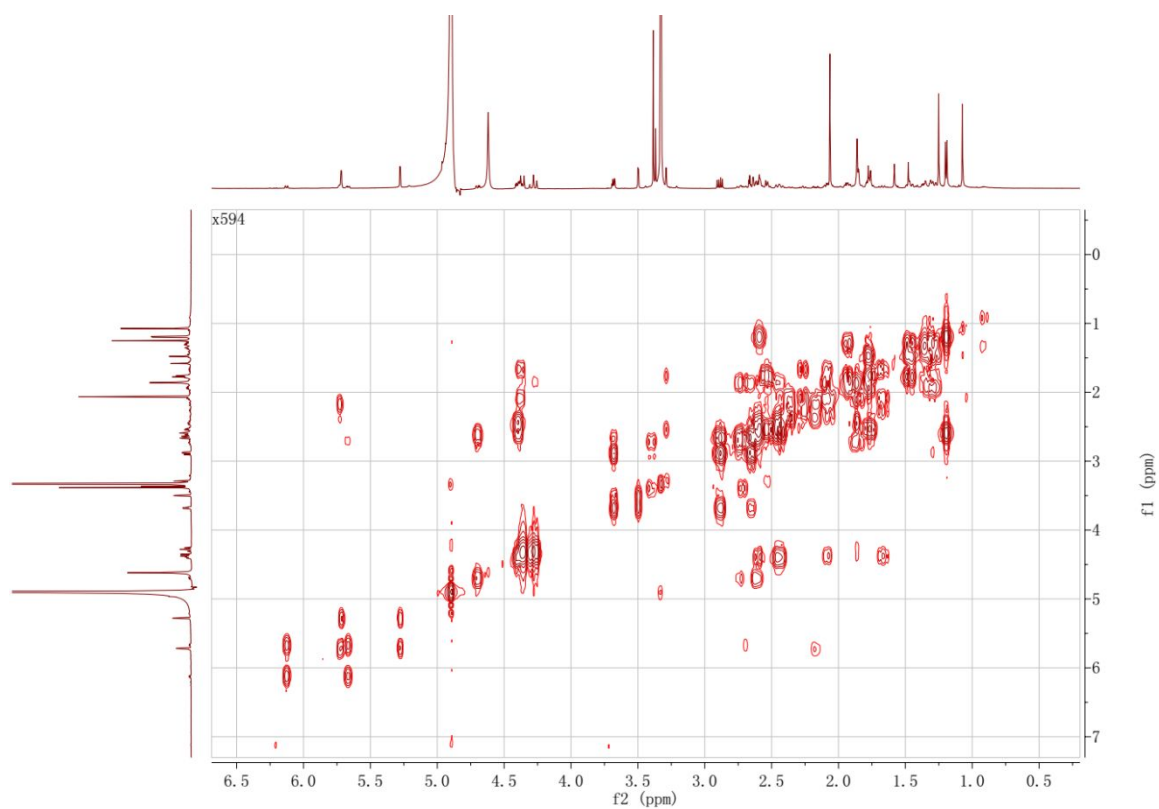

NOESY spectrum of compound **1** in CD<sub>3</sub>OD

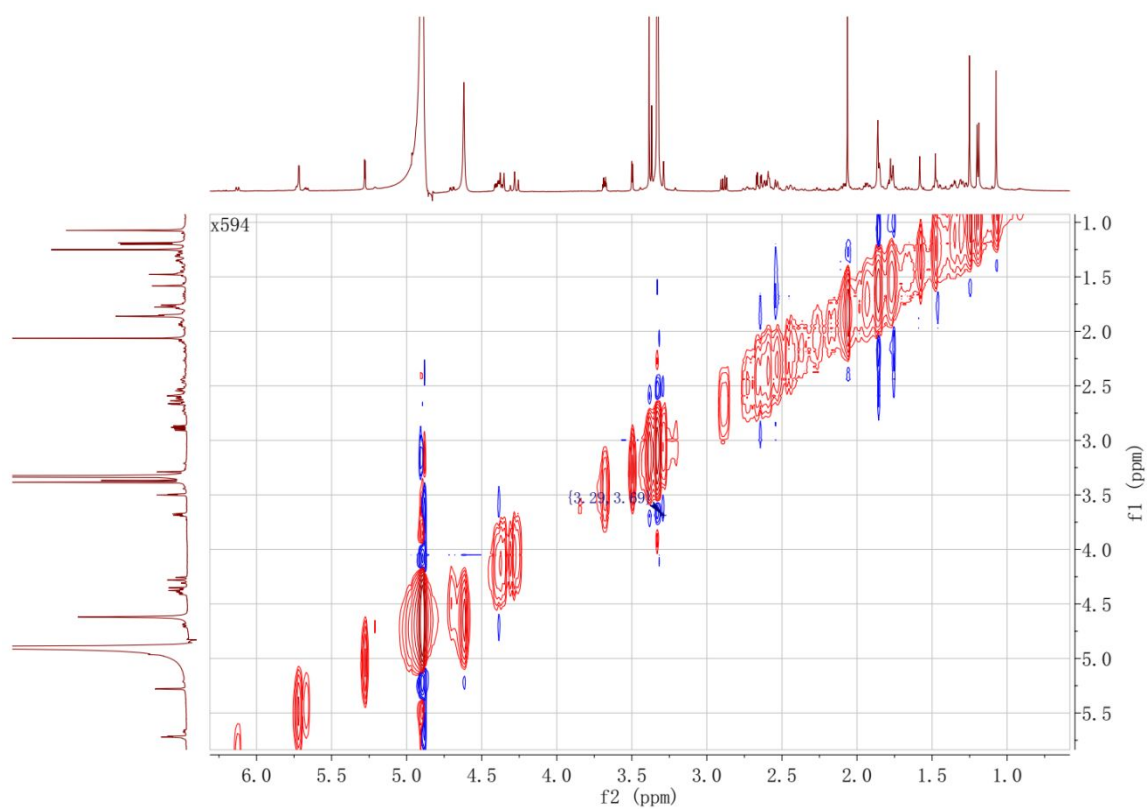

## ECD spectrum of 1

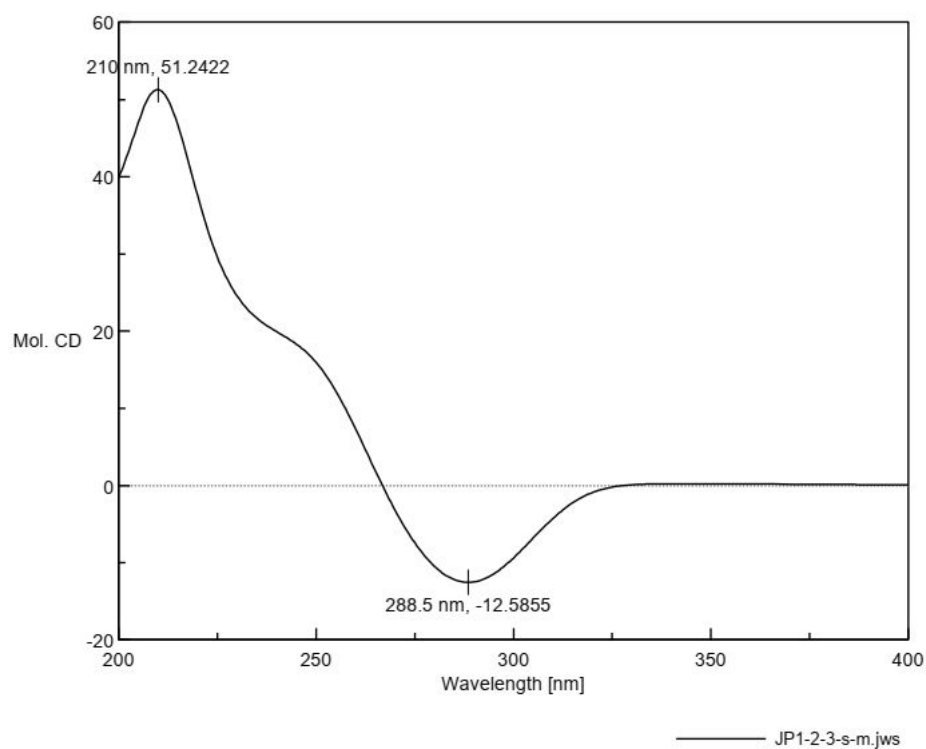

[Measurement Information]  
Instrument Name J-815  
Model Name J-815  
Serial No. A024461168  
  
Accessory Standard  
Accessory S/N A024461168  
Cell Length 1 mm  
  
Measurement date 2020/3/19 11:25  
  
Photometric Mode CD, HT, Abs  
Measure Range 400 - 200 nm  
Data pitch 0.5 nm  
Sensitivity Standard  
D.I.T. 1 sec  
Bandwidth 1.00 nm  
Start Mode Immediately  
Scanning Speed 100 nm/min  
Baseline Correction Baseline  
Shutter Control Auto  
CD Detector PMT  
PMT Voltage Auto  
Accumulations 2  
Solvent MEOH  
Concentration 0.4 (w/v)%

## HR-ESI-MS spectrum of compound 2

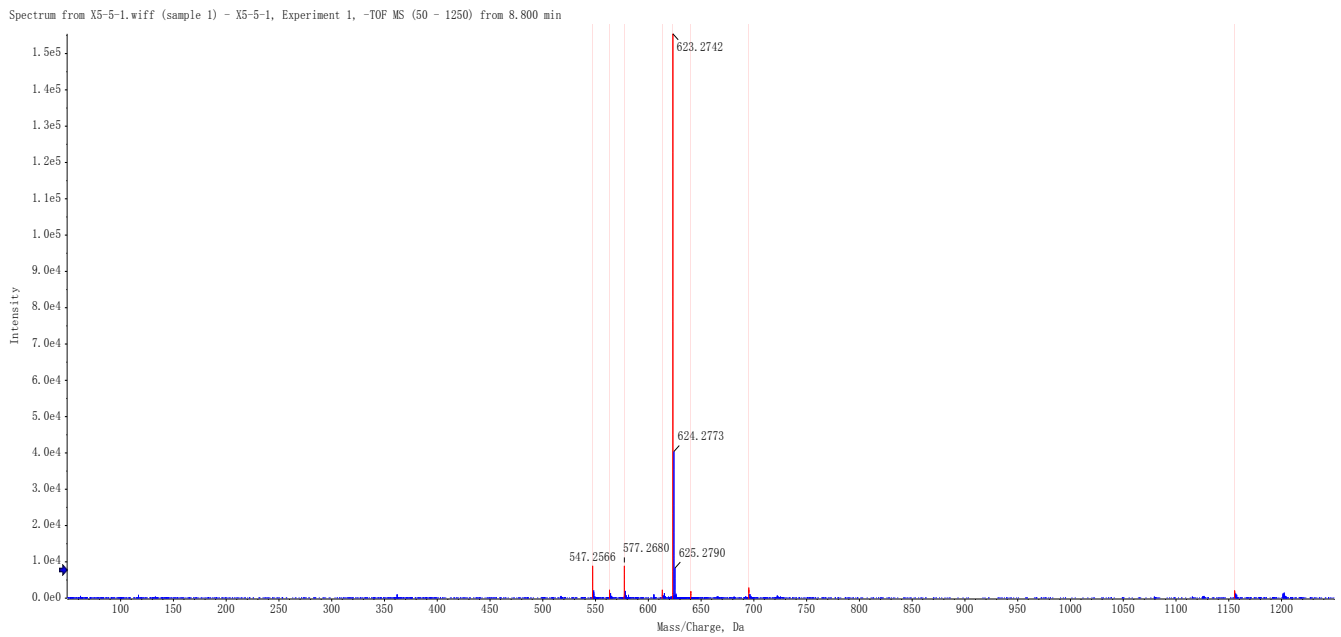

## $^1\text{H}$ NMR spectrum of compound 2 in $\text{CD}_3\text{OD}$ at 600 MHz

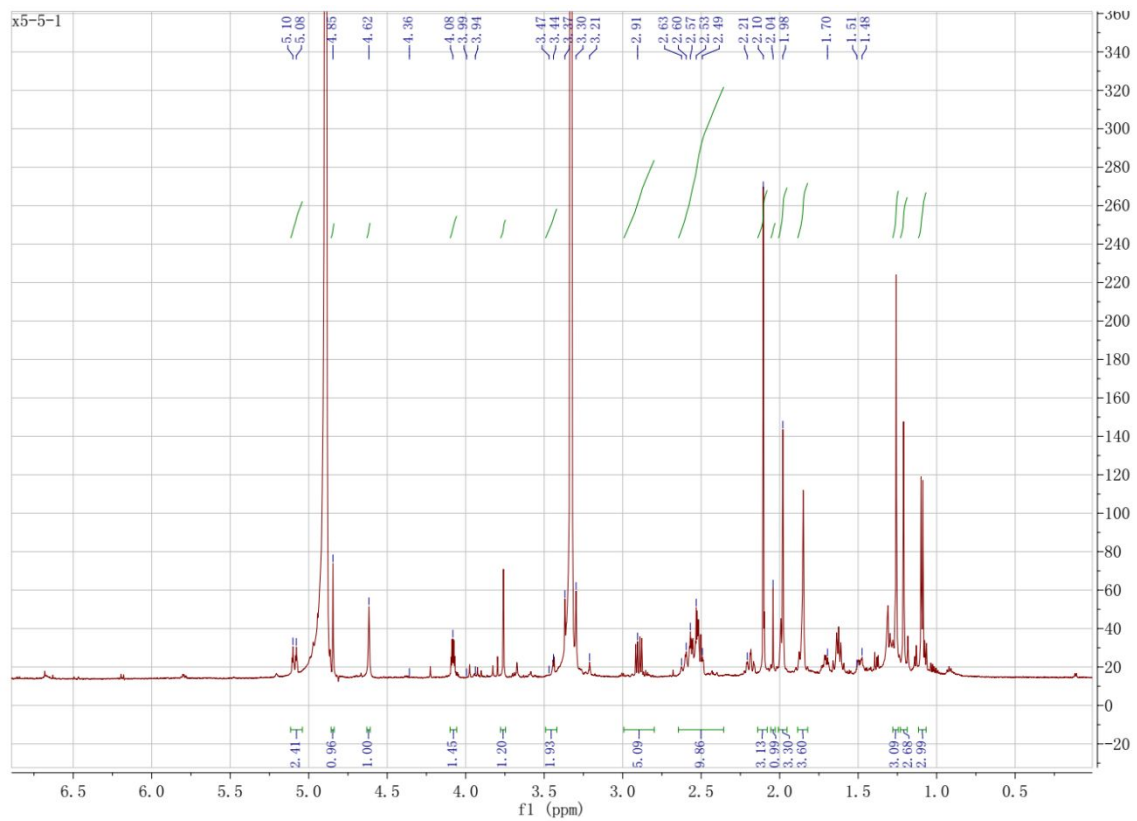

Detailed  $^1\text{H}$  NMR spectrum of compound **2** in  $\text{CD}_3\text{OD}$  at 600 MHz

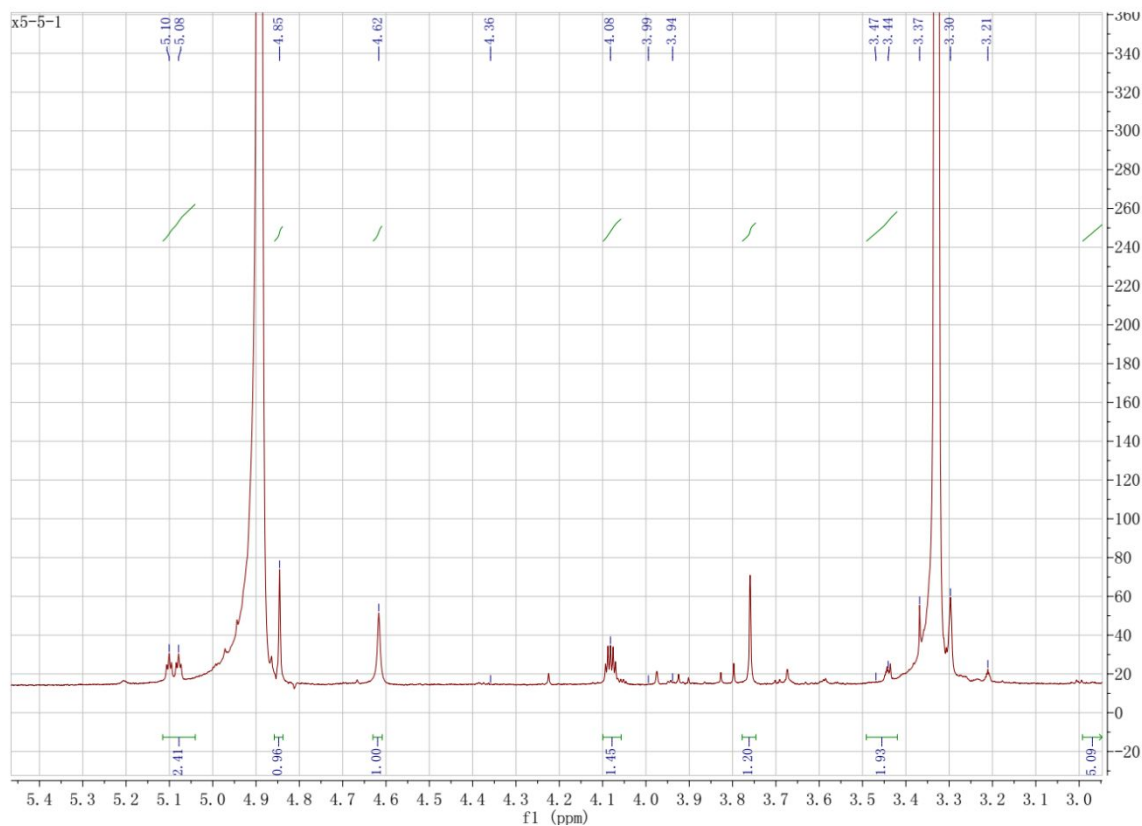

Detailed  $^1\text{H}$  NMR spectrum of compound **2** in  $\text{CD}_3\text{OD}$  at 600 MHz

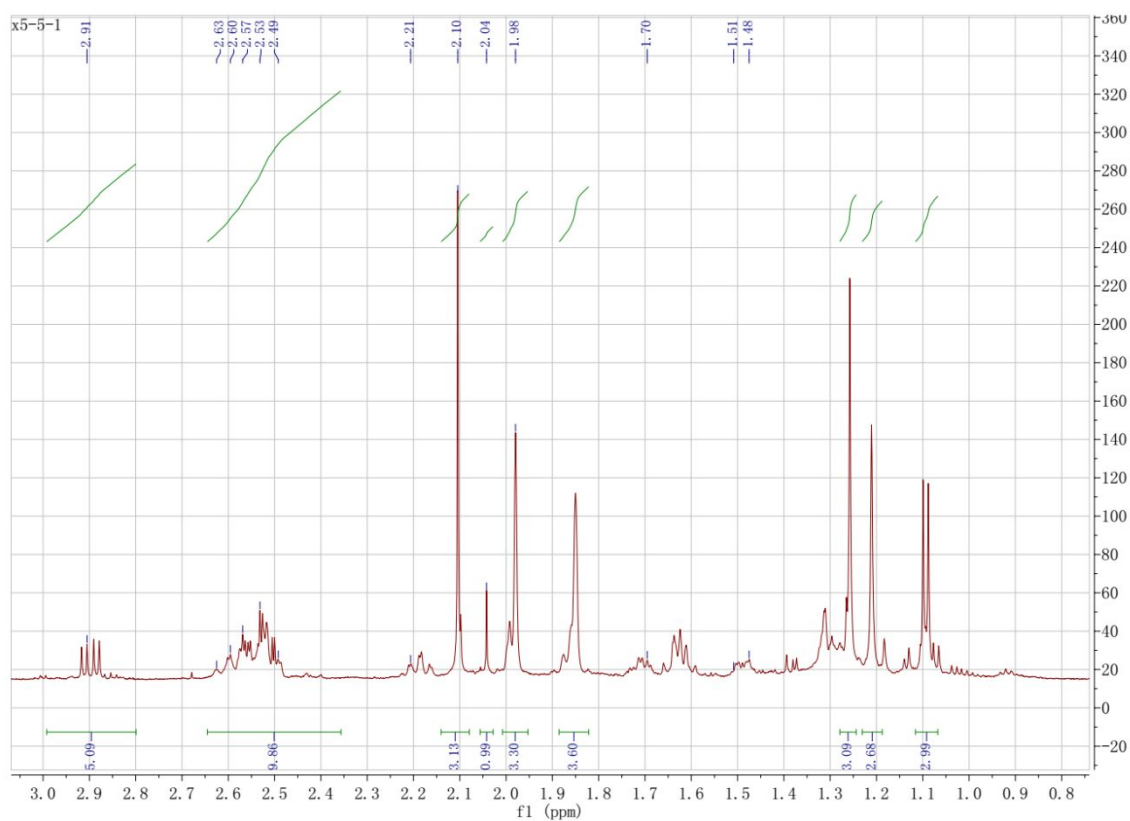

$^{13}\text{C}$  NMR spectrum of compound **2** in  $\text{CD}_3\text{OD}$  at 150 MHz

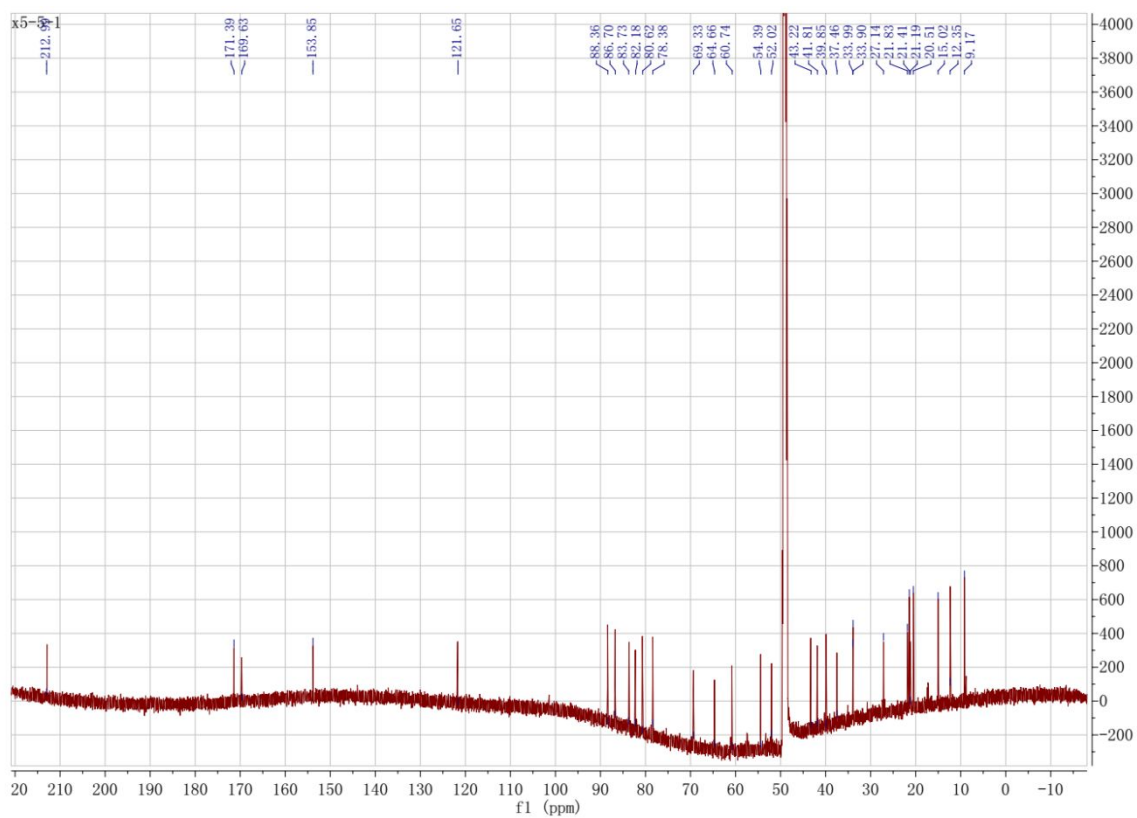

Detailed  $^{13}\text{C}$  NMR spectrum of compound **2** in  $\text{CD}_3\text{OD}$  at 150 MHz

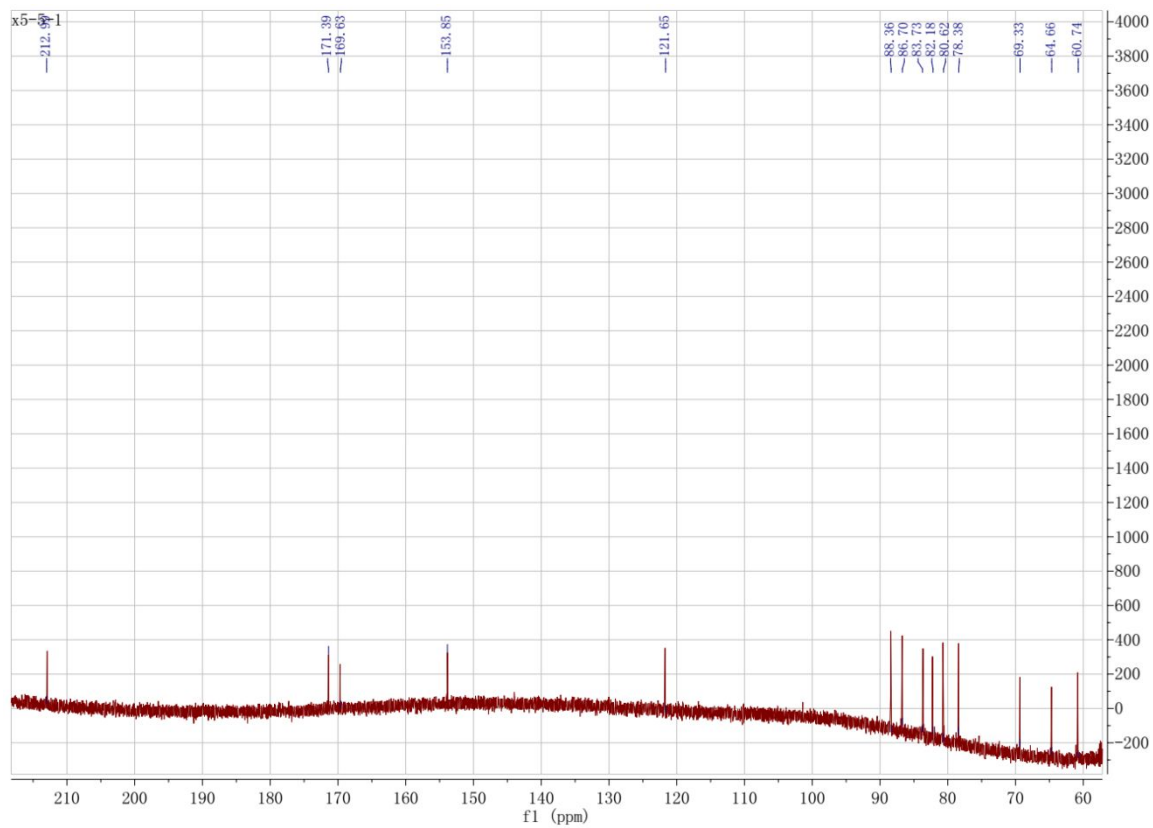

Detailed  $^{13}\text{C}$  NMR spectrum of compound **2** in  $\text{CD}_3\text{OD}$  at 150 MHz

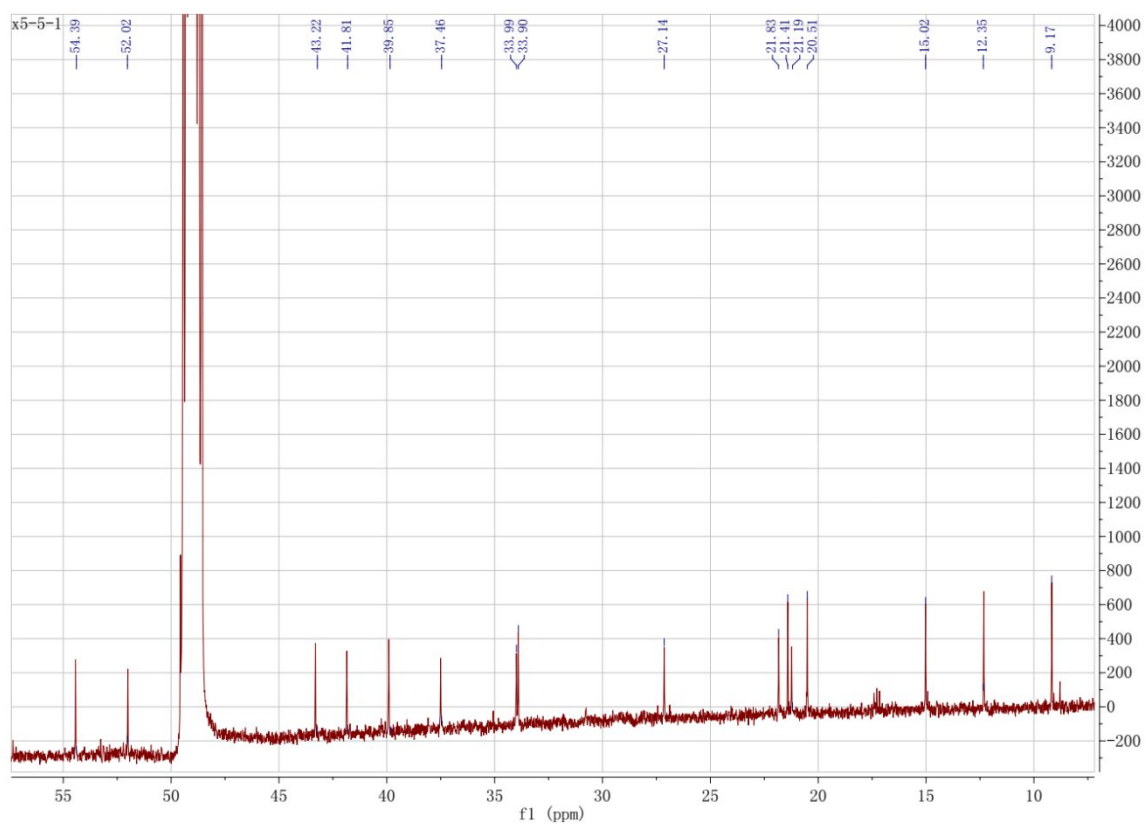

HSQC spectrum of compound **2** in  $\text{CD}_3\text{OD}$

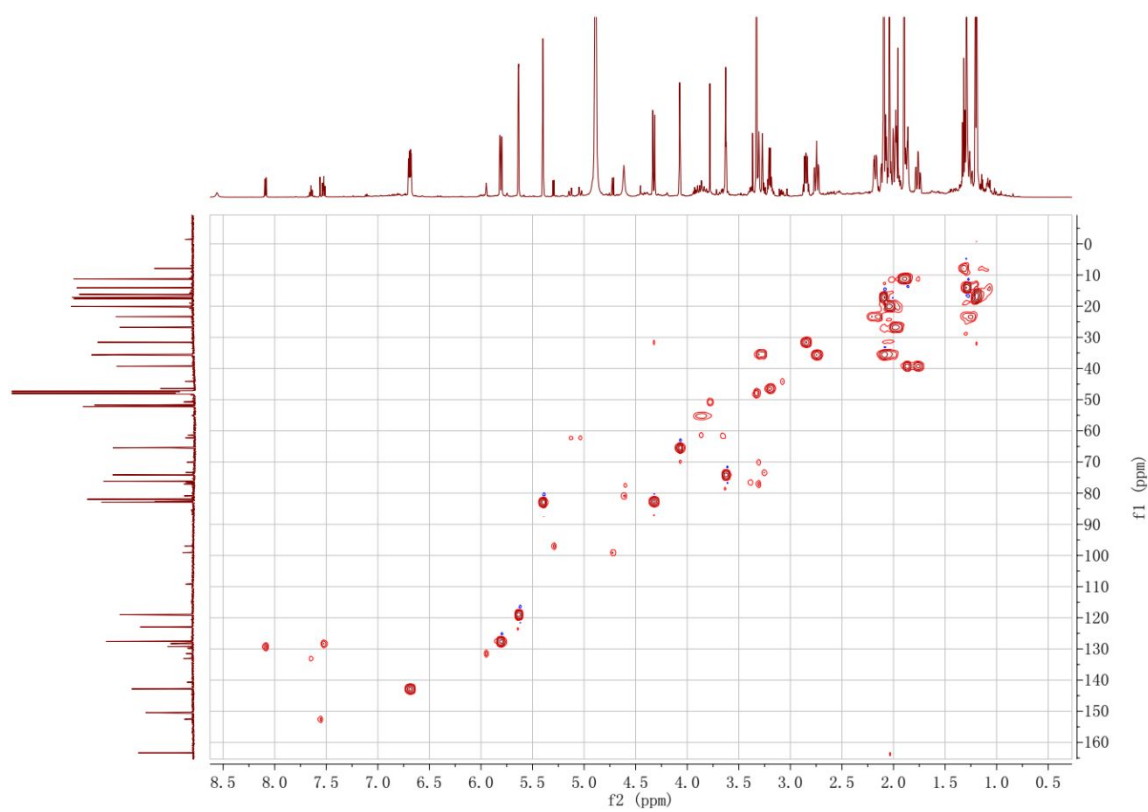



HMBC spectrum of compound **2** in CD<sub>3</sub>OD

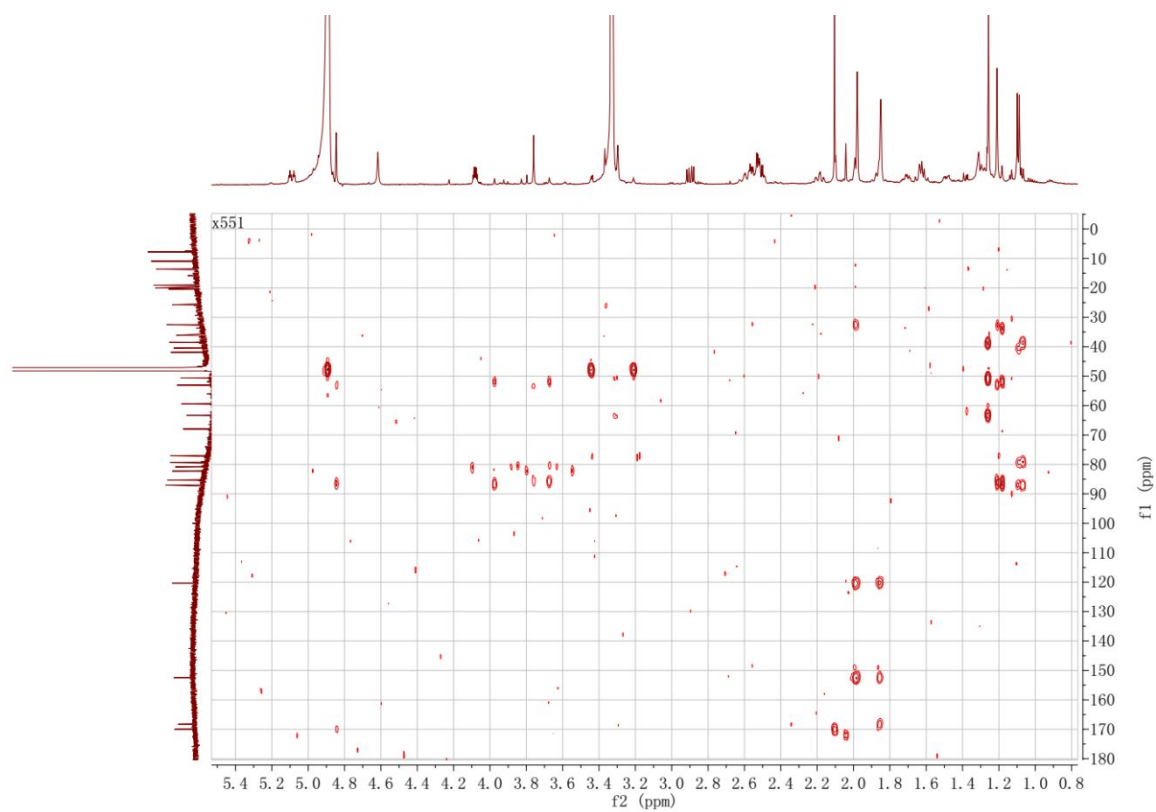

COSY spectrum of compound **2** in CD<sub>3</sub>OD

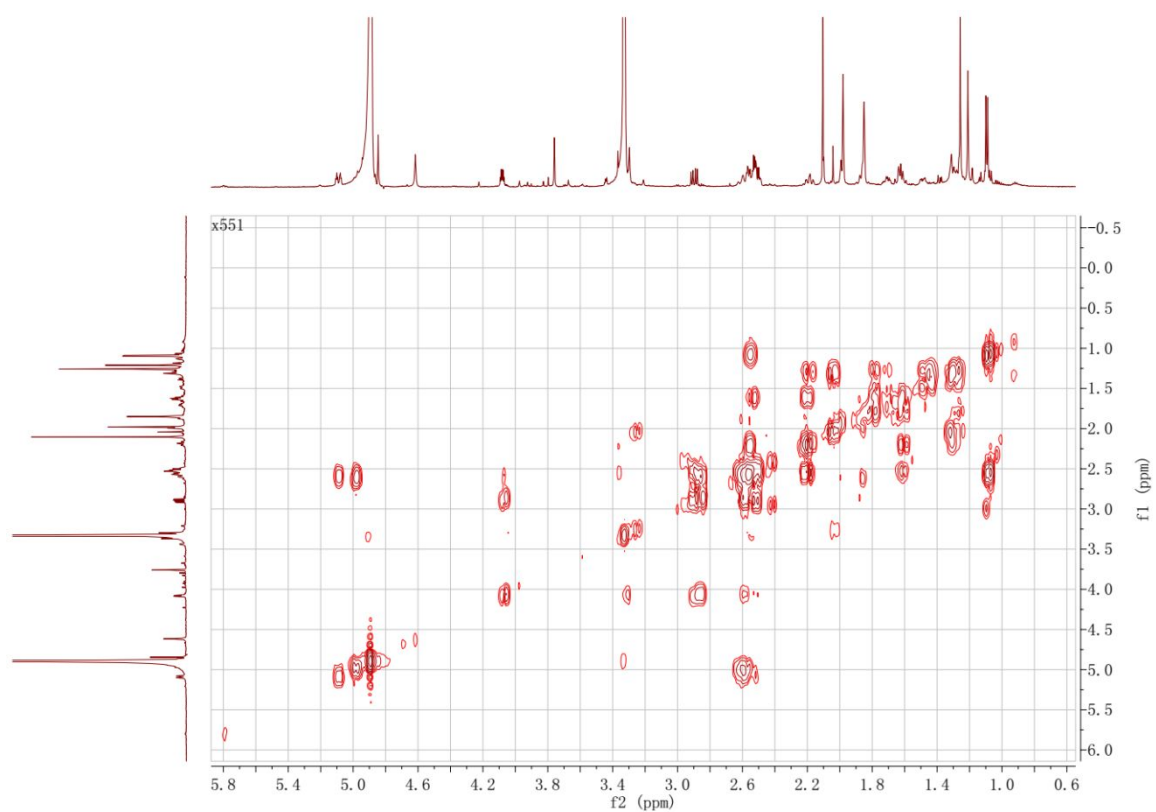

NOESY spectrum of compound **2** in CD<sub>3</sub>OD

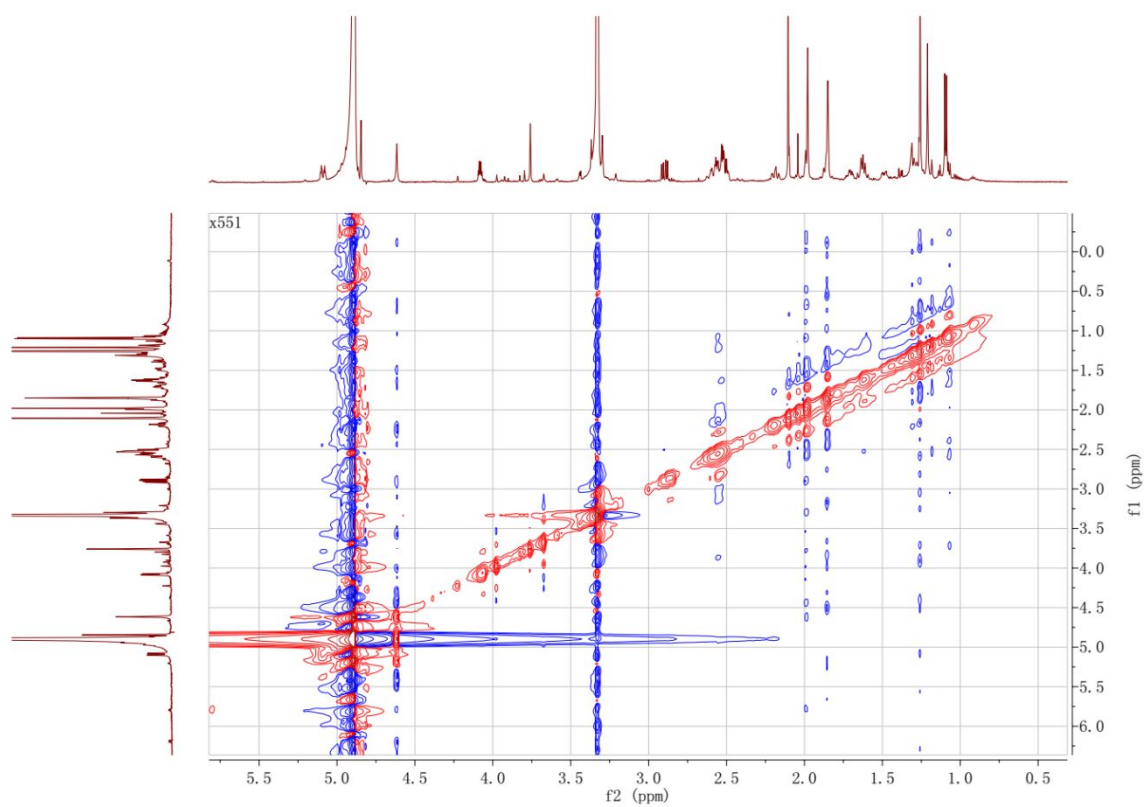

### HR-ESI-MS spectrum of compound 3

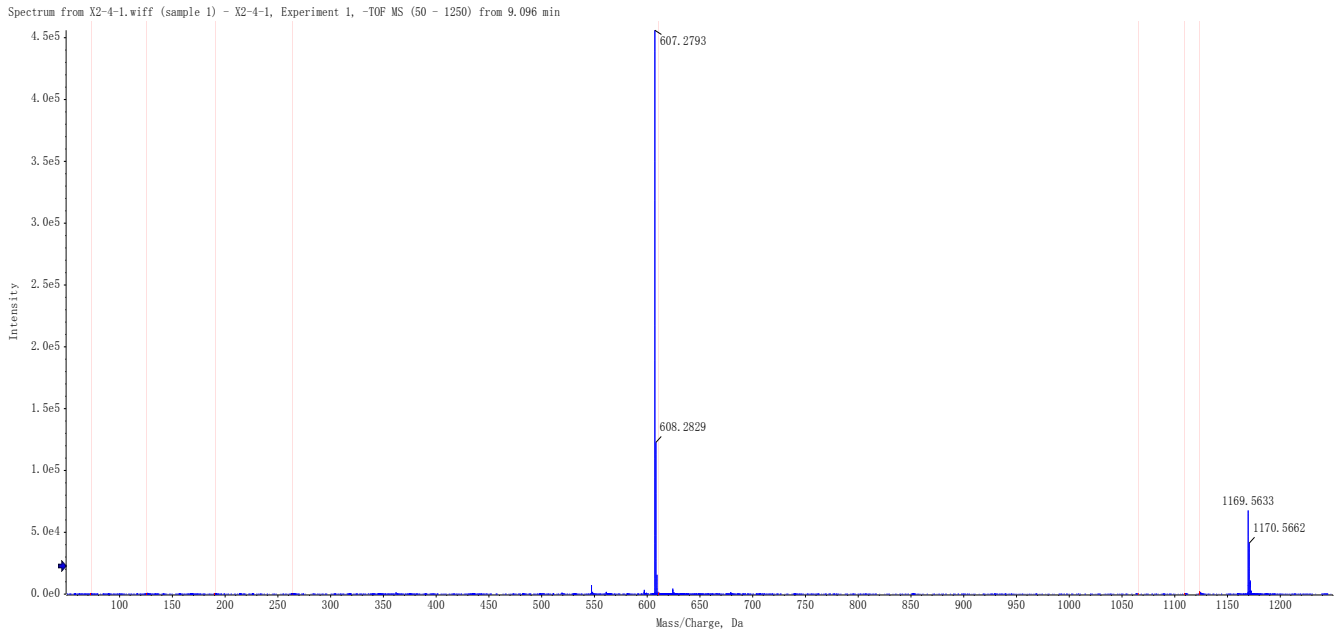

### <sup>1</sup>H NMR spectrum of compound 3 in CD<sub>3</sub>OD at 600 MHz

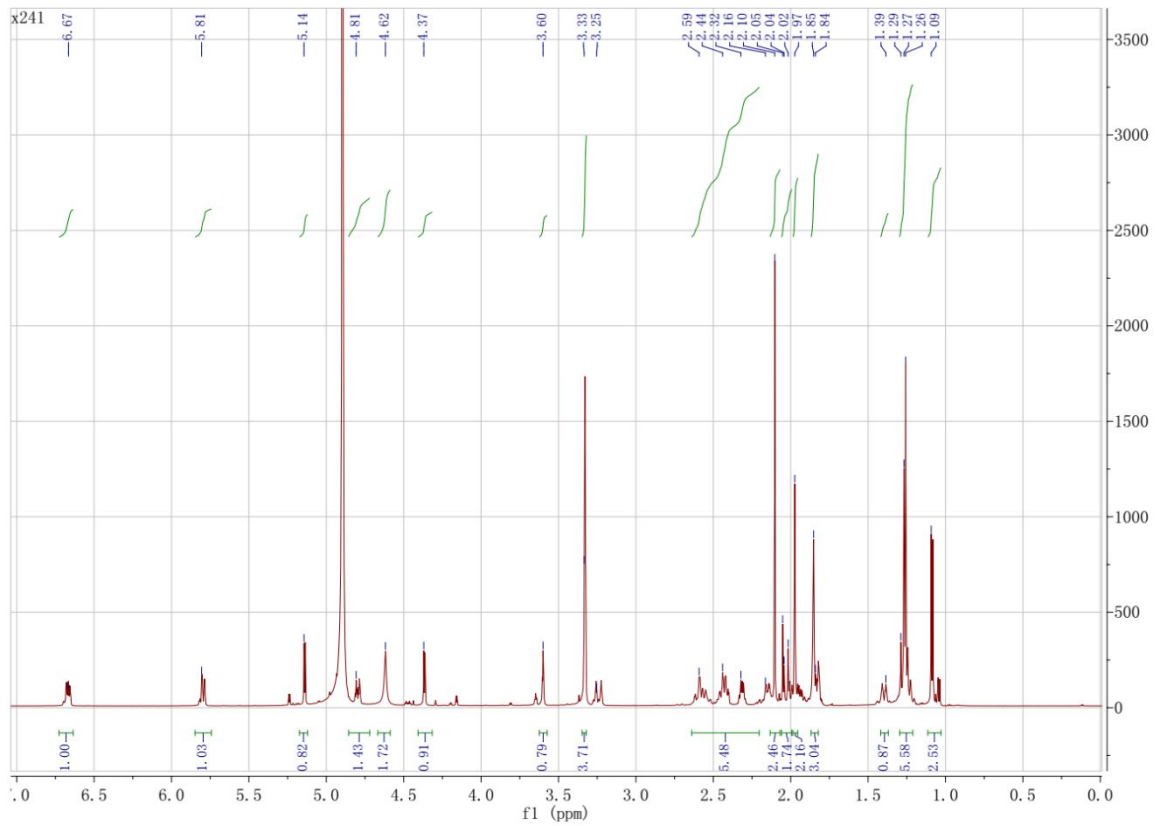

Detailed  $^1\text{H}$  NMR spectrum of compound **3** in  $\text{CD}_3\text{OD}$  at 600 MHz

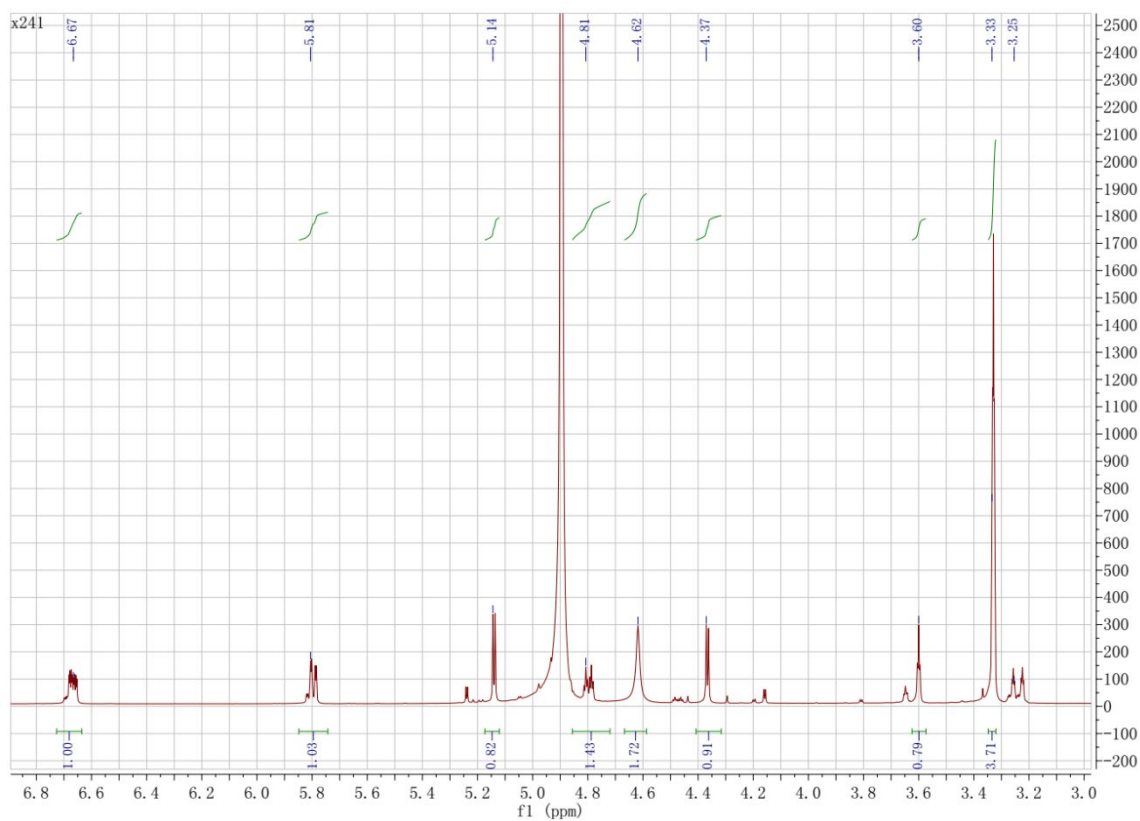

Detailed  $^1\text{H}$  NMR spectrum of compound **3** in  $\text{CD}_3\text{OD}$  at 600 MHz

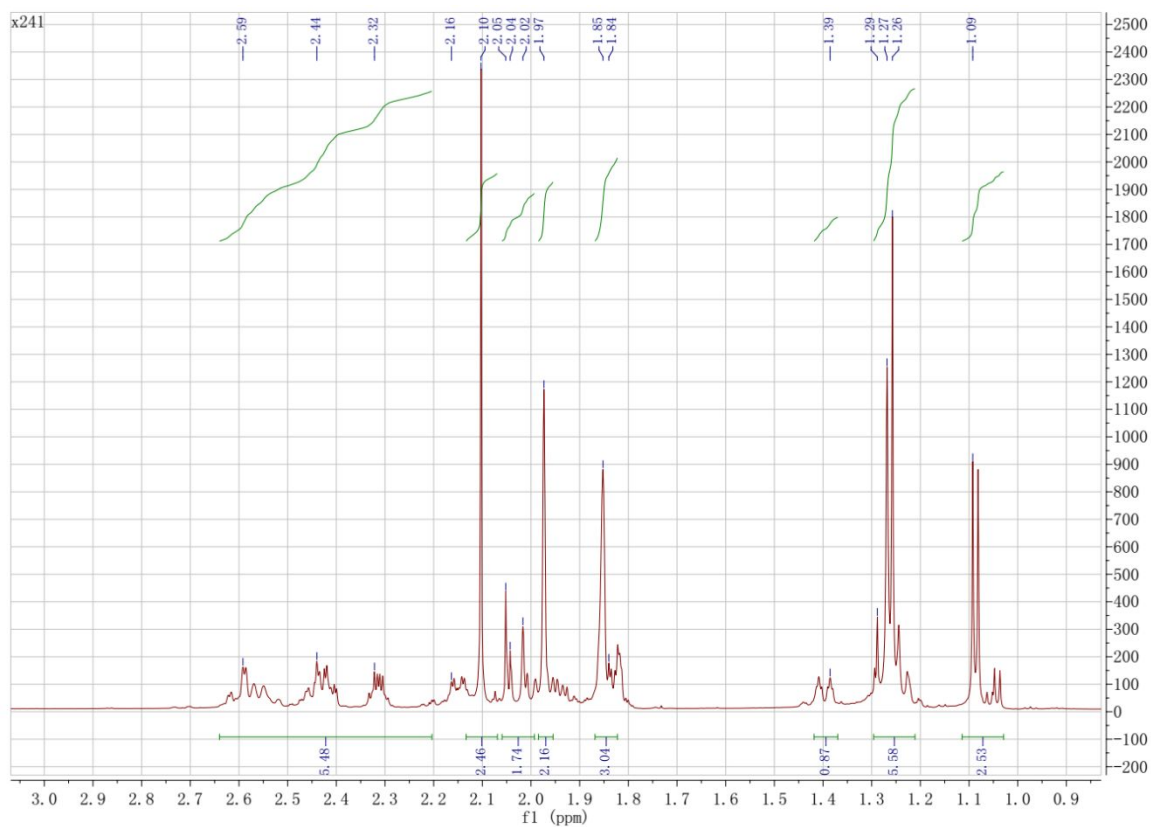

$^{13}\text{C}$  NMR spectrum of compound **3** in  $\text{CD}_3\text{OD}$  at 150 MHz

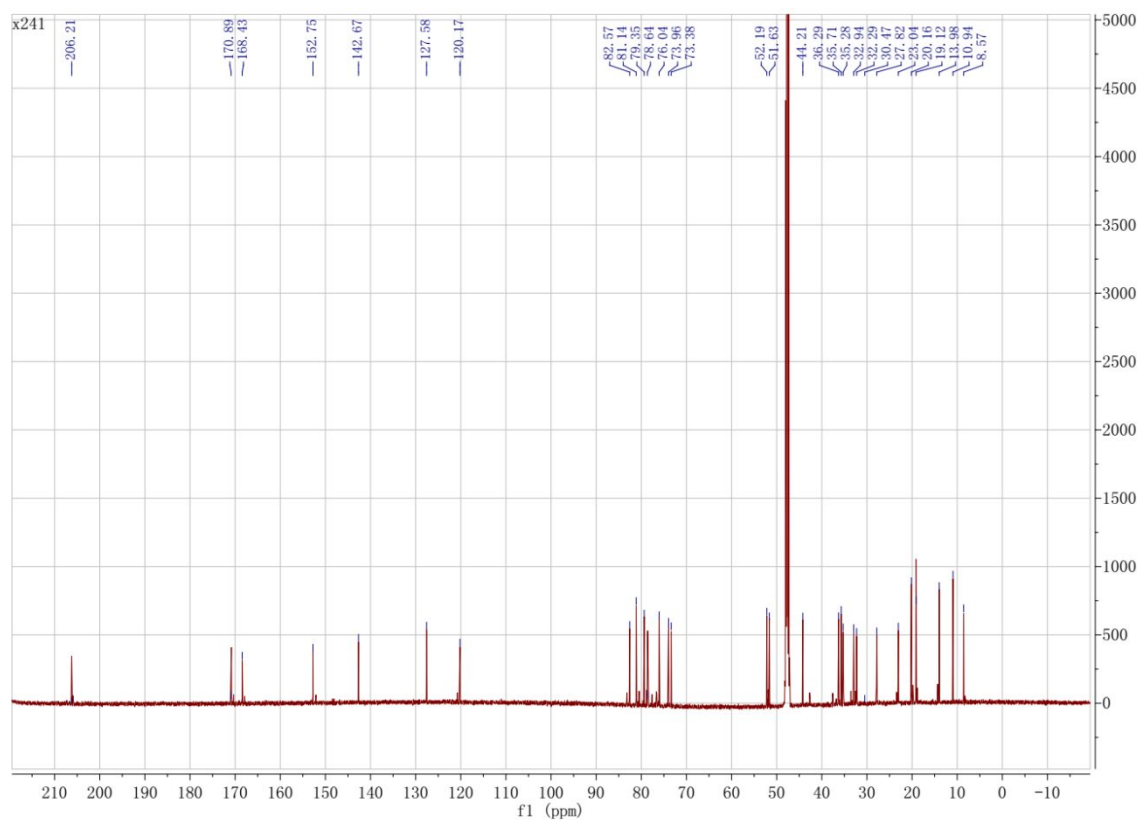

Detailed  $^{13}\text{C}$  NMR spectrum of compound **3** in  $\text{CD}_3\text{OD}$  at 150 MHz

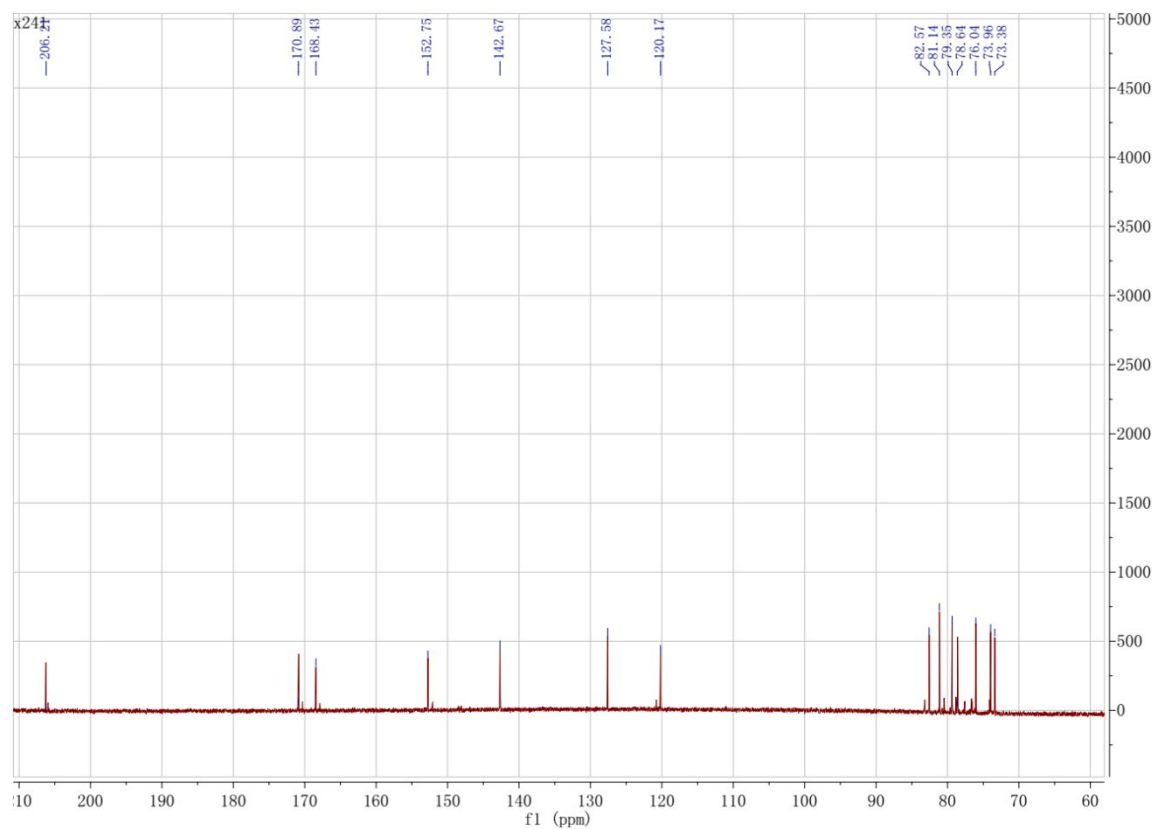

Detailed  $^{13}\text{C}$  NMR spectrum of compound **3** in  $\text{CD}_3\text{OD}$  at 150 MHz

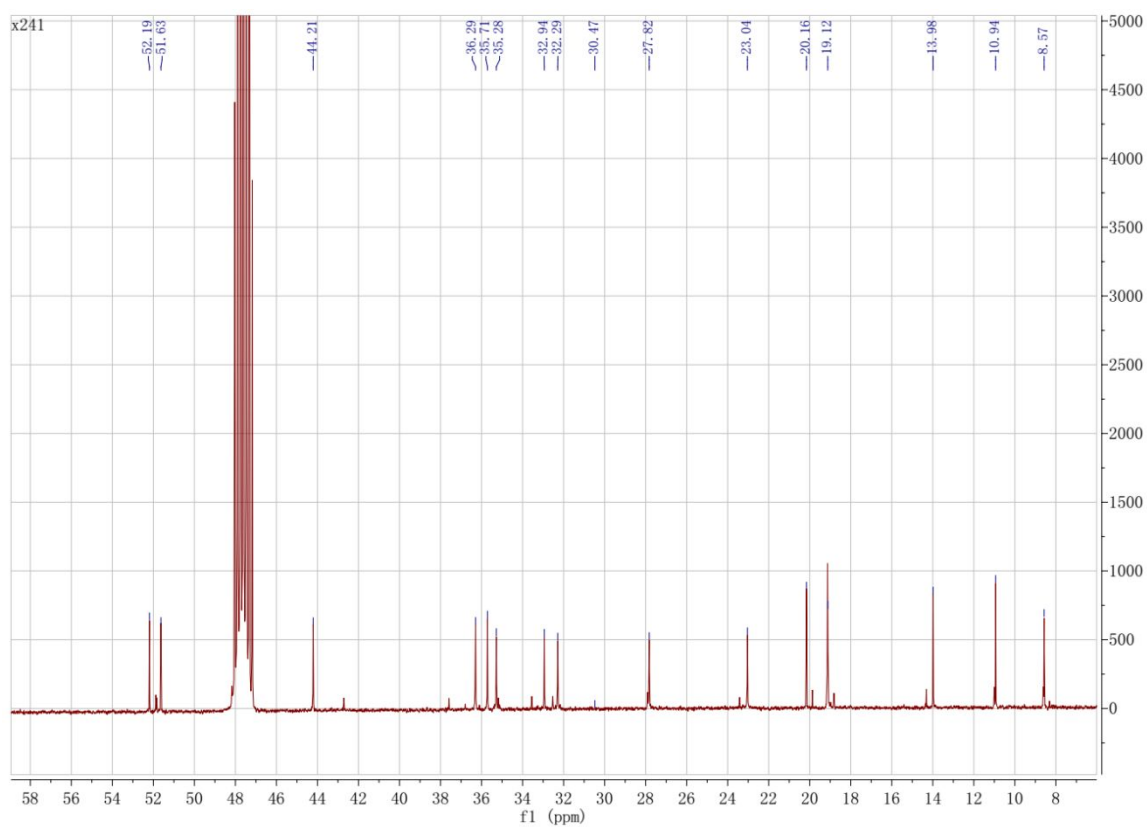

HSQC spectrum of compound **3** in  $\text{CD}_3\text{OD}$

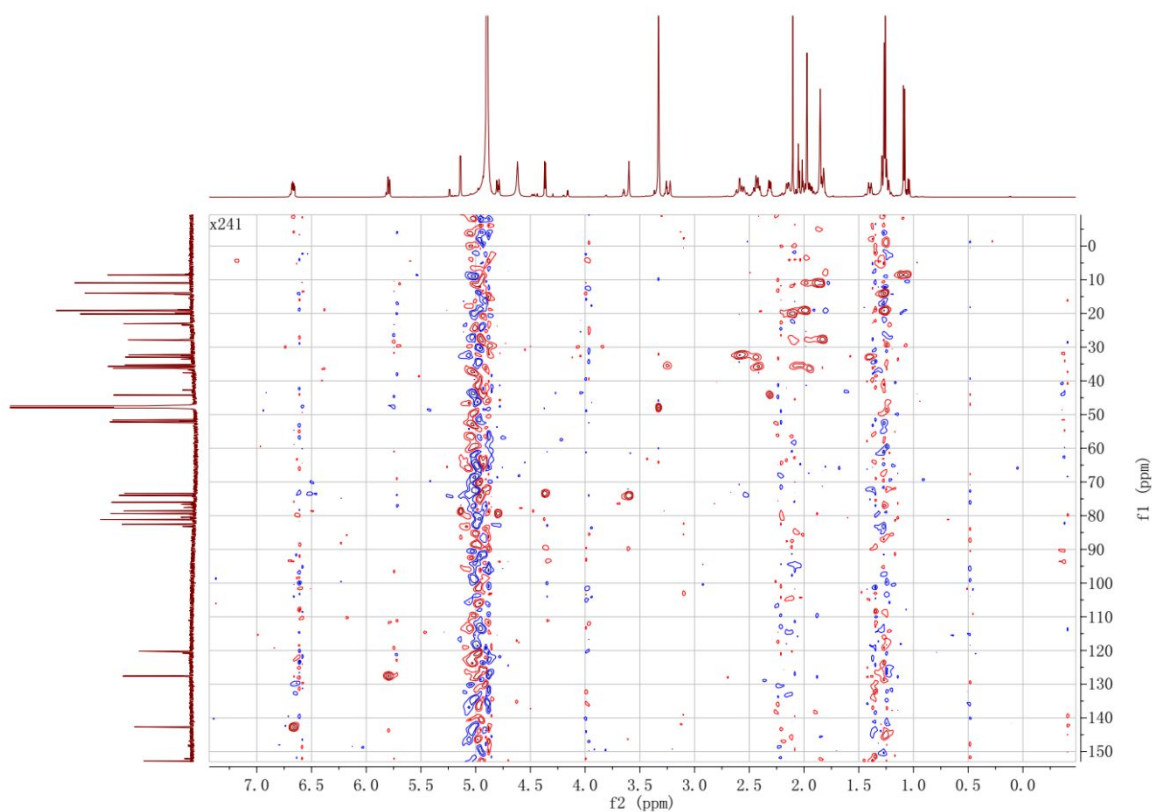

HMBC spectrum of compound **3** in CD<sub>3</sub>OD

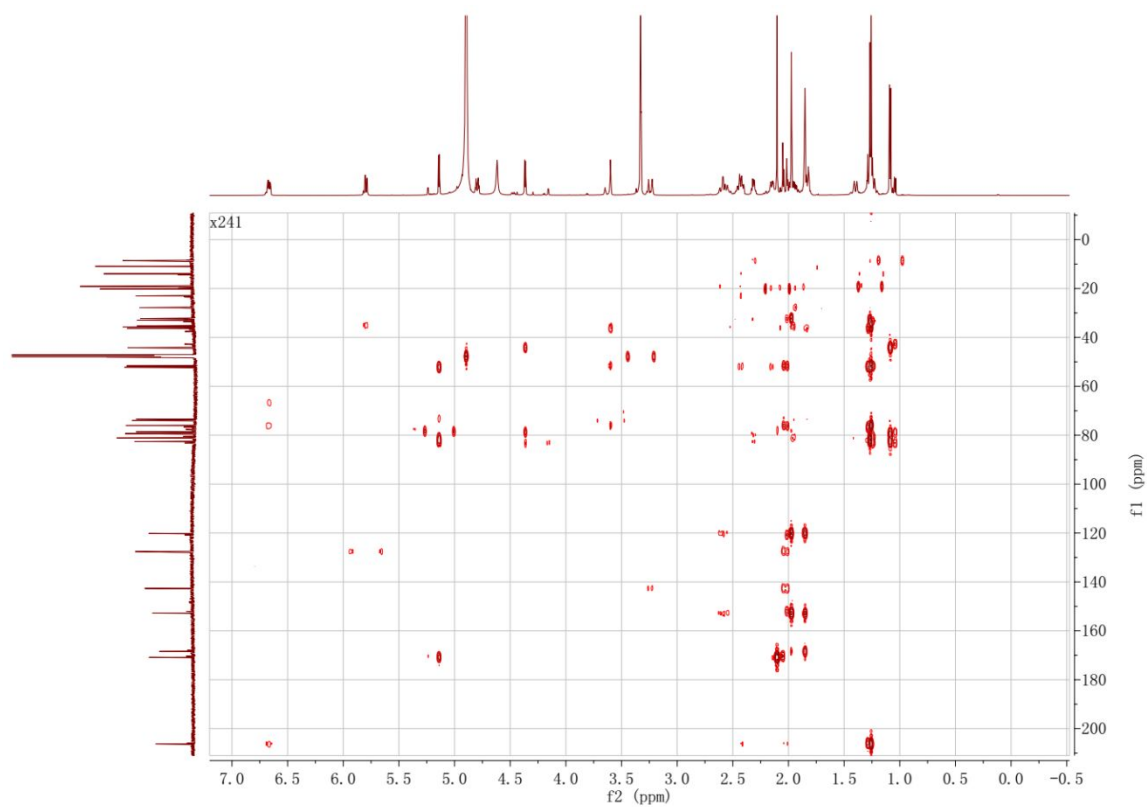

COSY spectrum of compound **3** in CD<sub>3</sub>OD

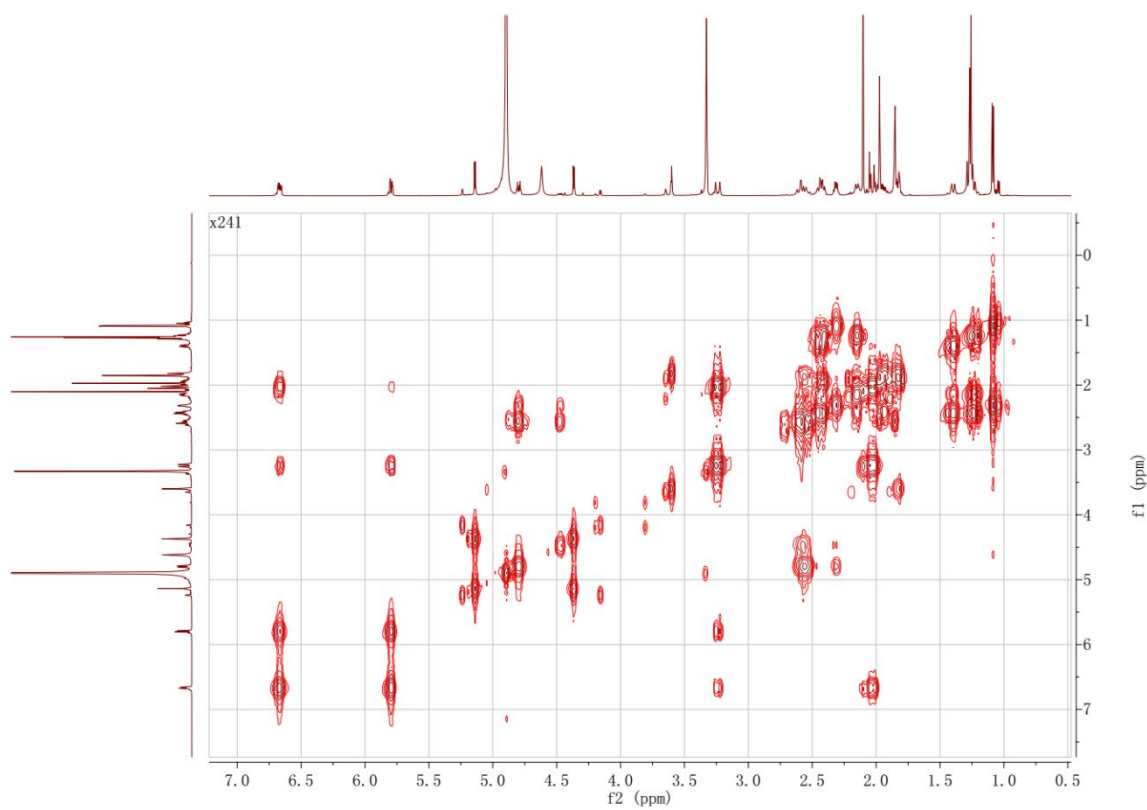

NOESY spectrum of compound **3** in CD<sub>3</sub>OD

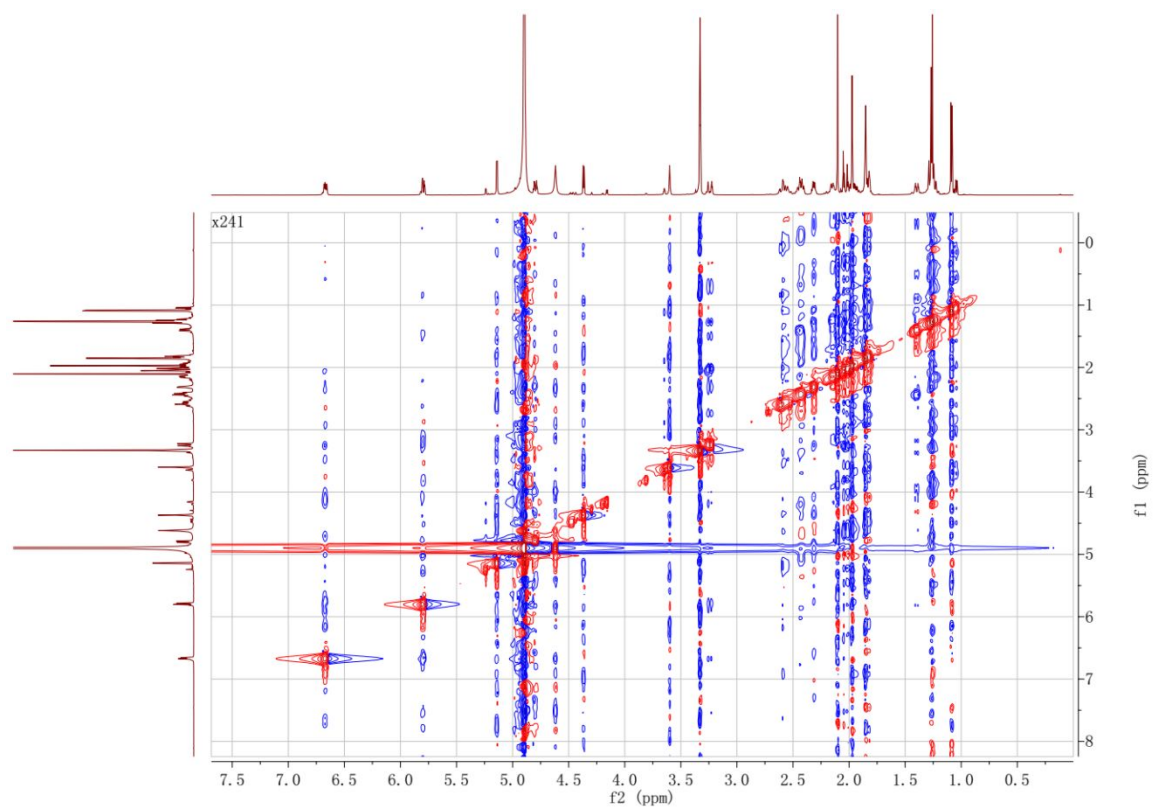



# HR-ESI-MS spectrum of compound 4

Spectrum from X6-1-1.wiff (sample 1) - X6-1-1, Experiment 1, -TOF MS (50 - 1250) from 9.297 min

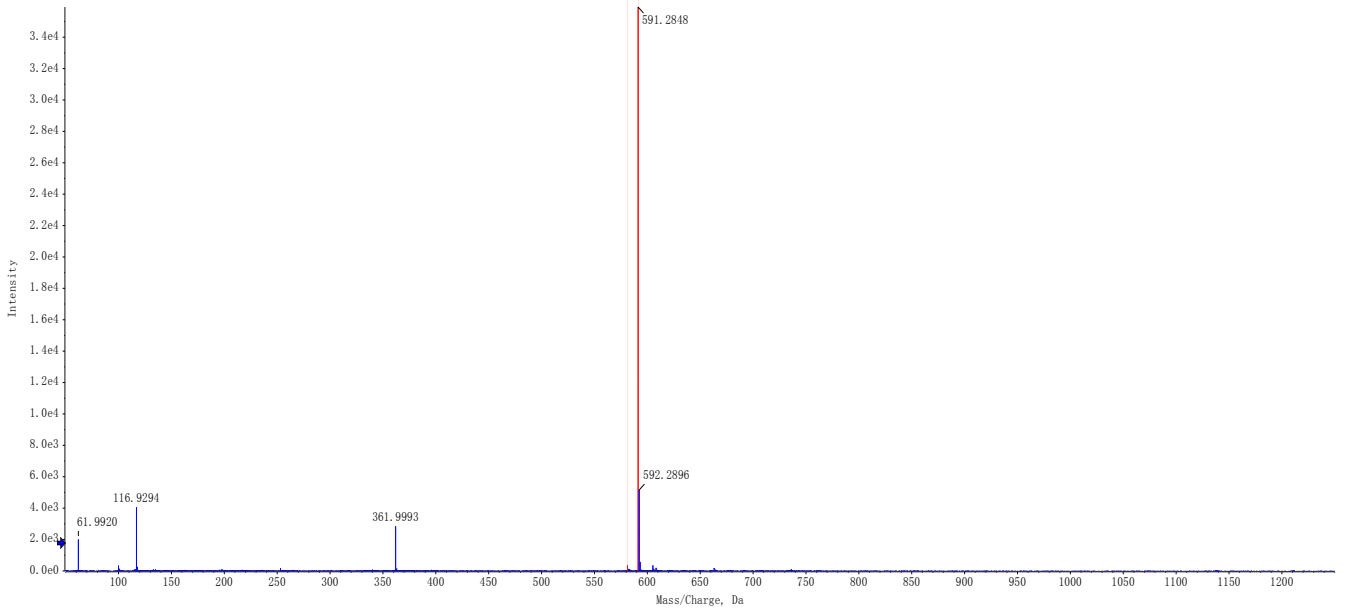

# <sup>1</sup>H NMR spectrum of compound 4 in CD<sub>3</sub>OD at 600 MHz

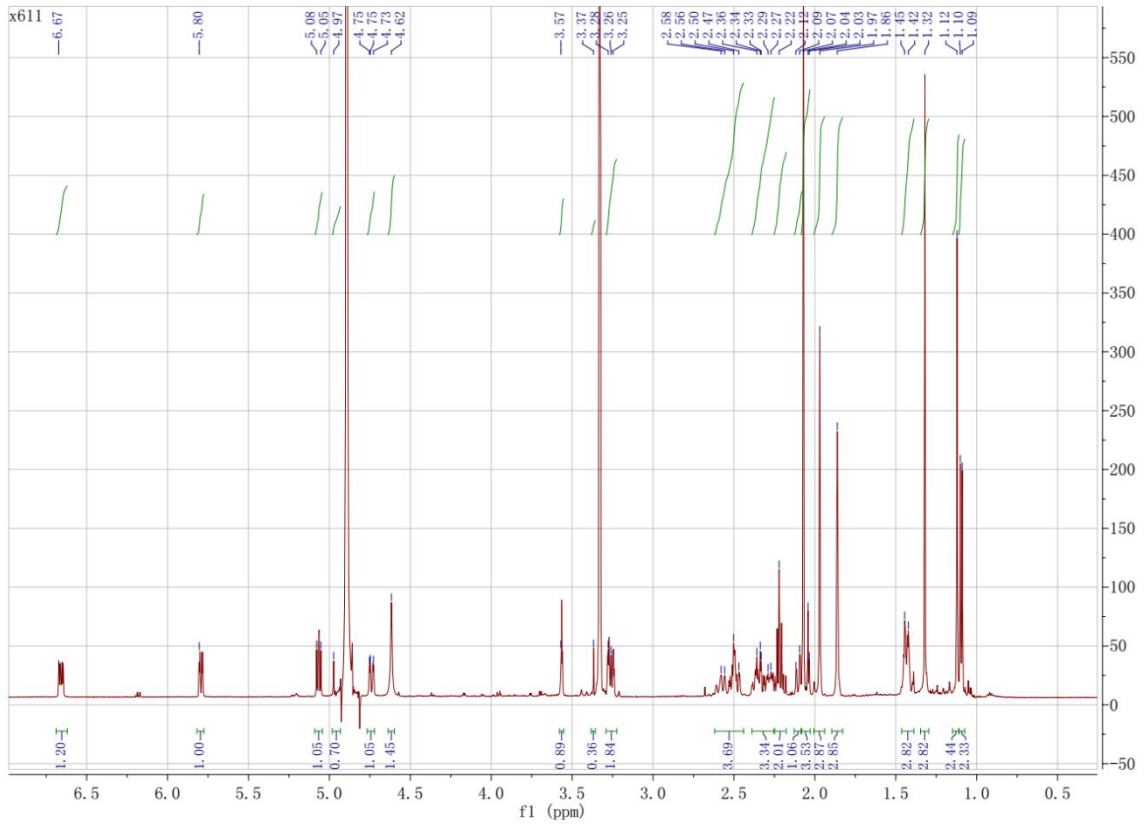

Detailed  $^1\text{H}$  NMR spectrum of compound **4** in  $\text{CD}_3\text{OD}$  at 600 MHz

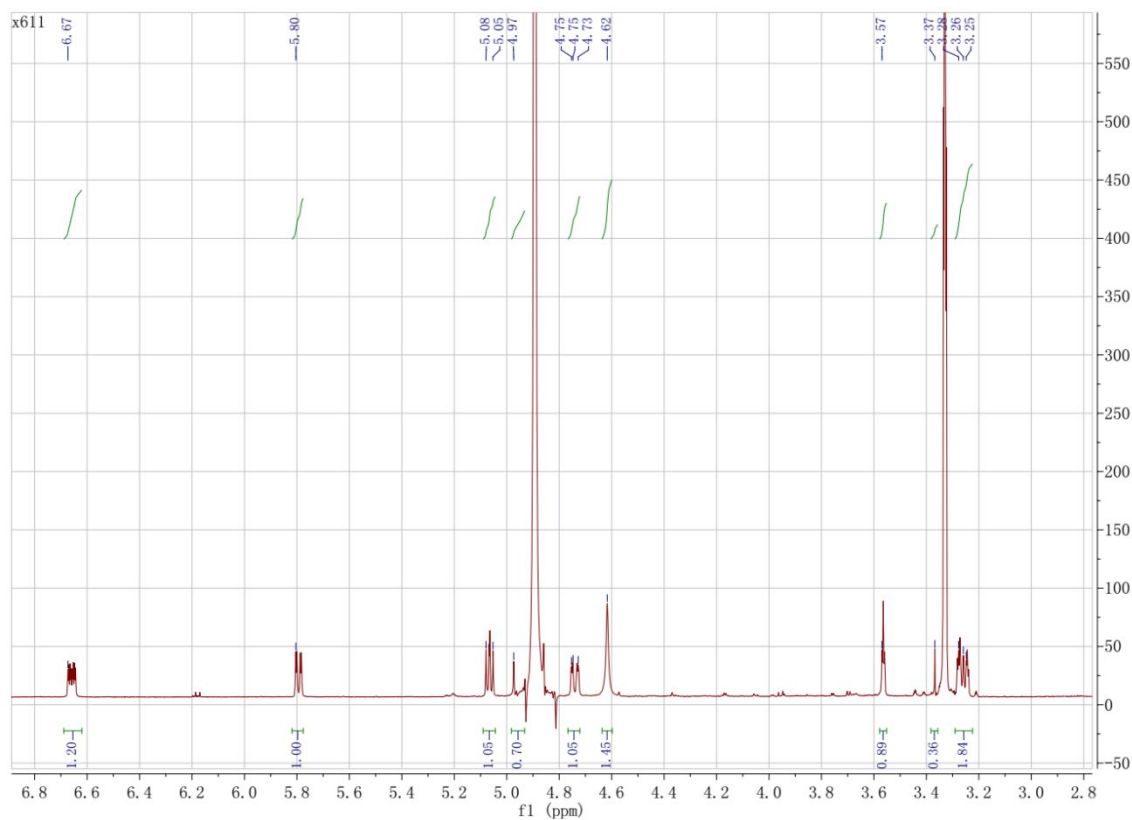

Detailed  $^1\text{H}$  NMR spectrum of compound **4** in  $\text{CD}_3\text{OD}$  at 600 MHz

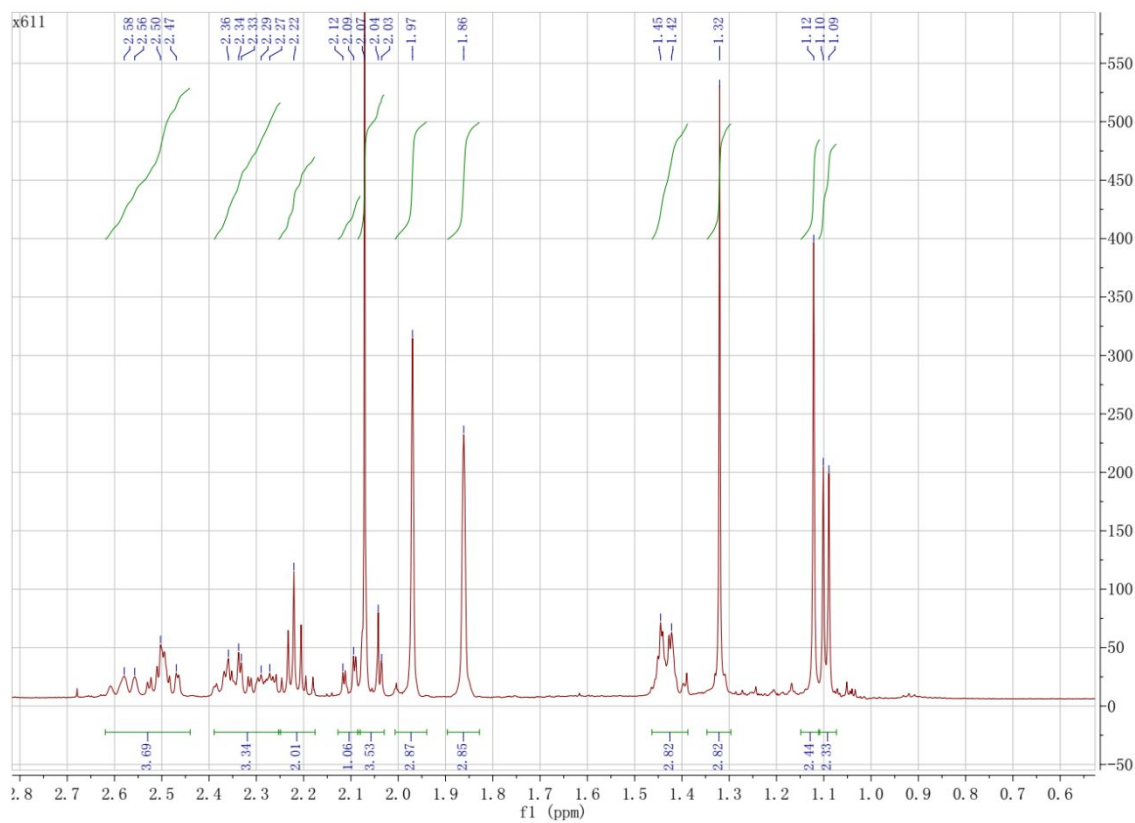

$^{13}\text{C}$  NMR spectrum of compound **4** in  $\text{CD}_3\text{OD}$  at 150 MHz

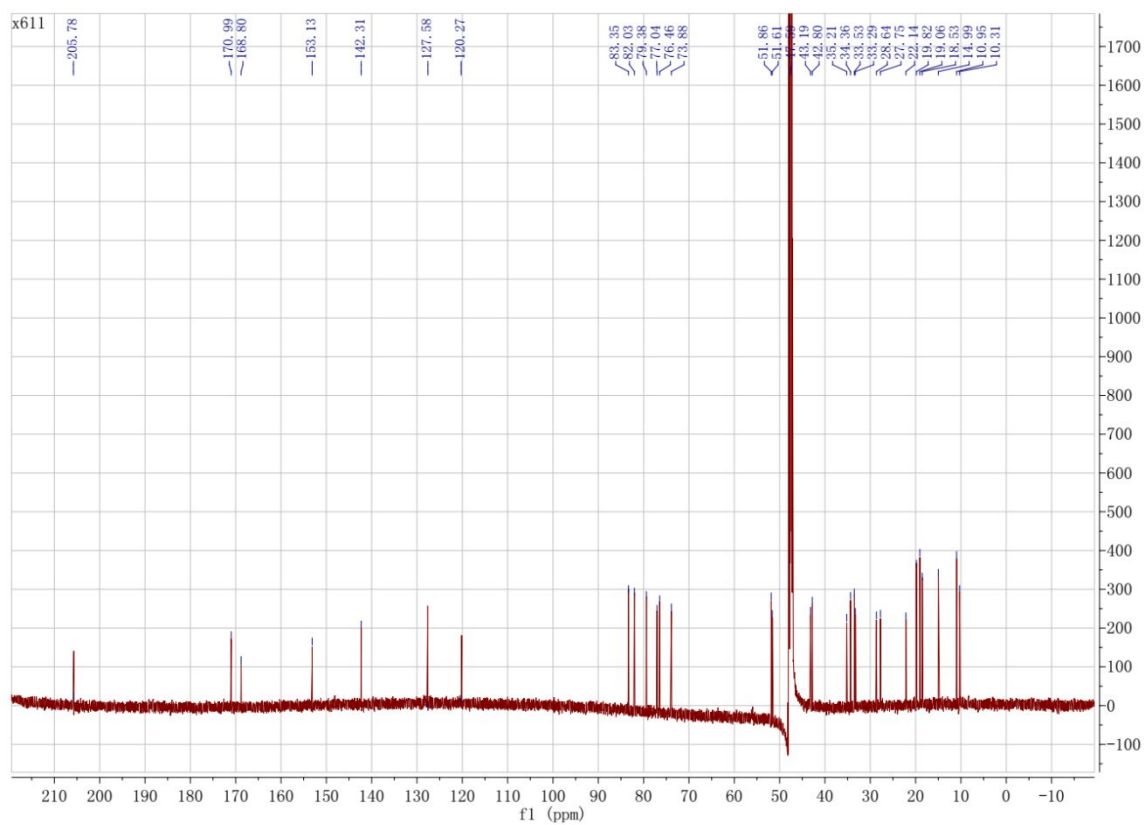

Detailed  $^{13}\text{C}$  NMR spectrum of compound **4** in  $\text{CD}_3\text{OD}$  at 150 MHz

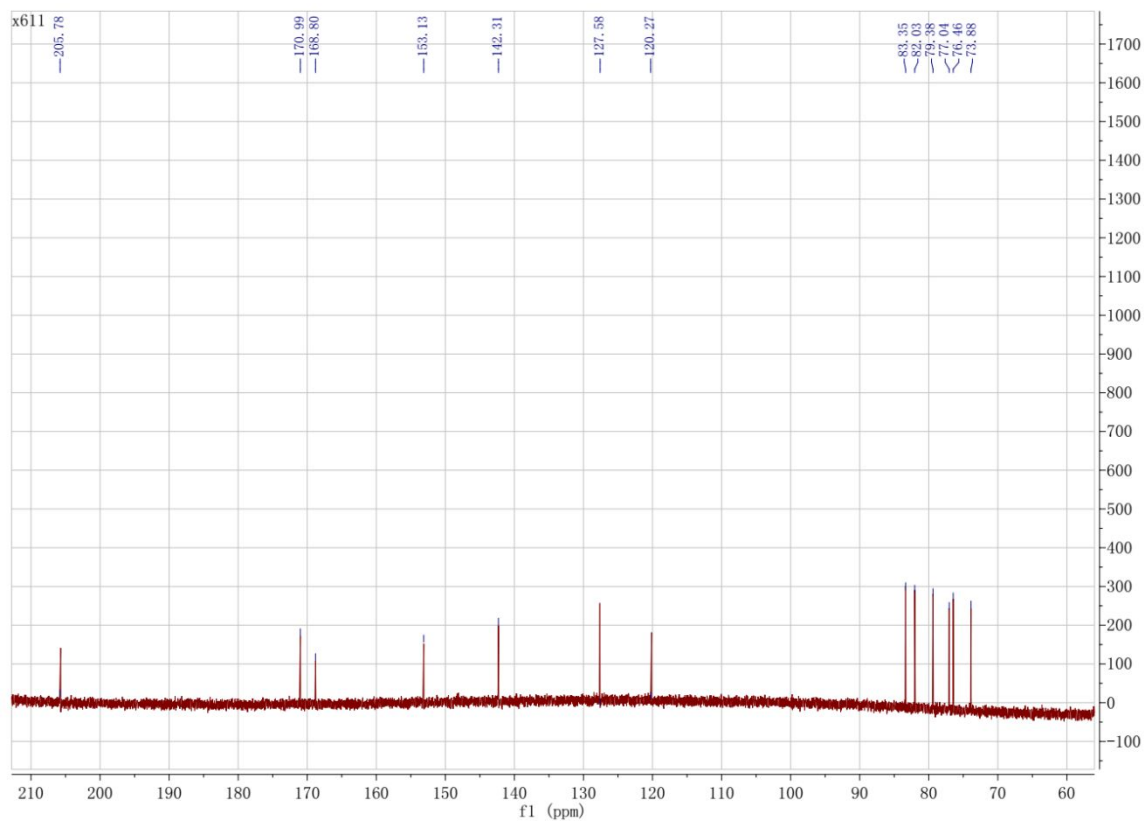

Detailed  $^{13}\text{C}$  NMR spectrum of compound **4** in  $\text{CD}_3\text{OD}$  at 150 MHz

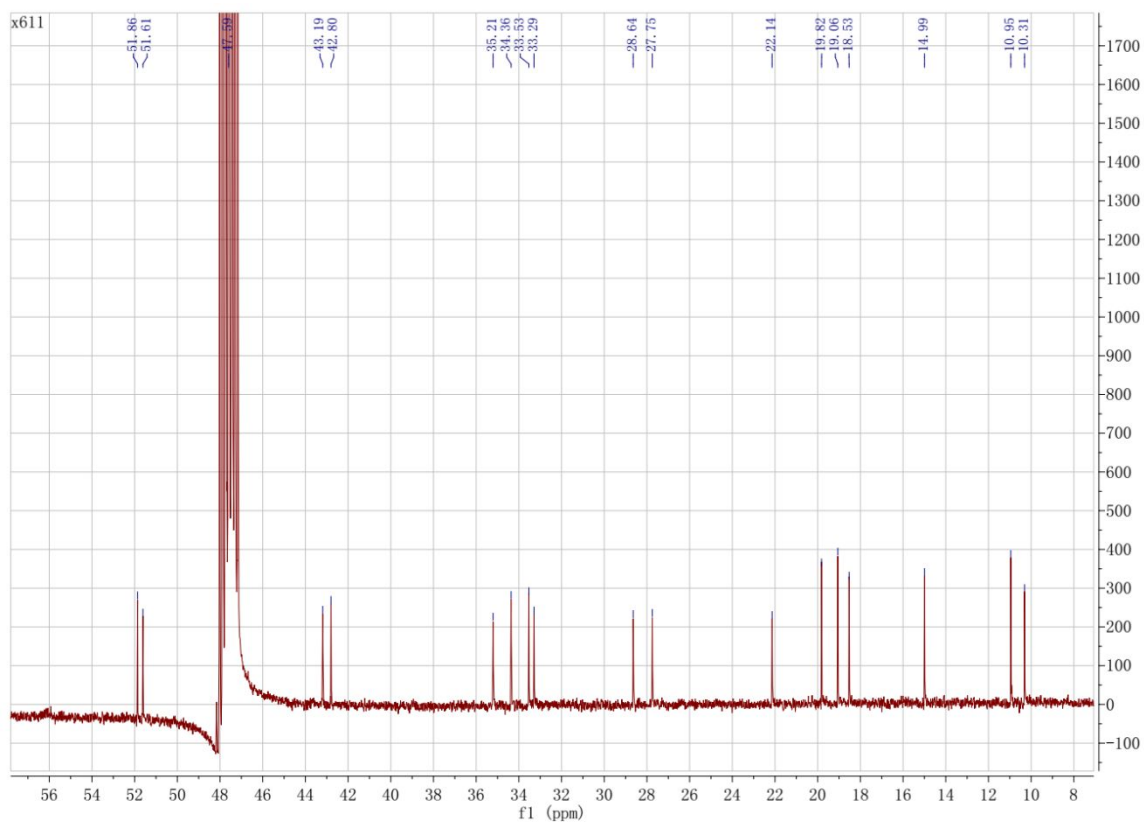

HSQC spectrum of compound **4** in  $\text{CD}_3\text{OD}$

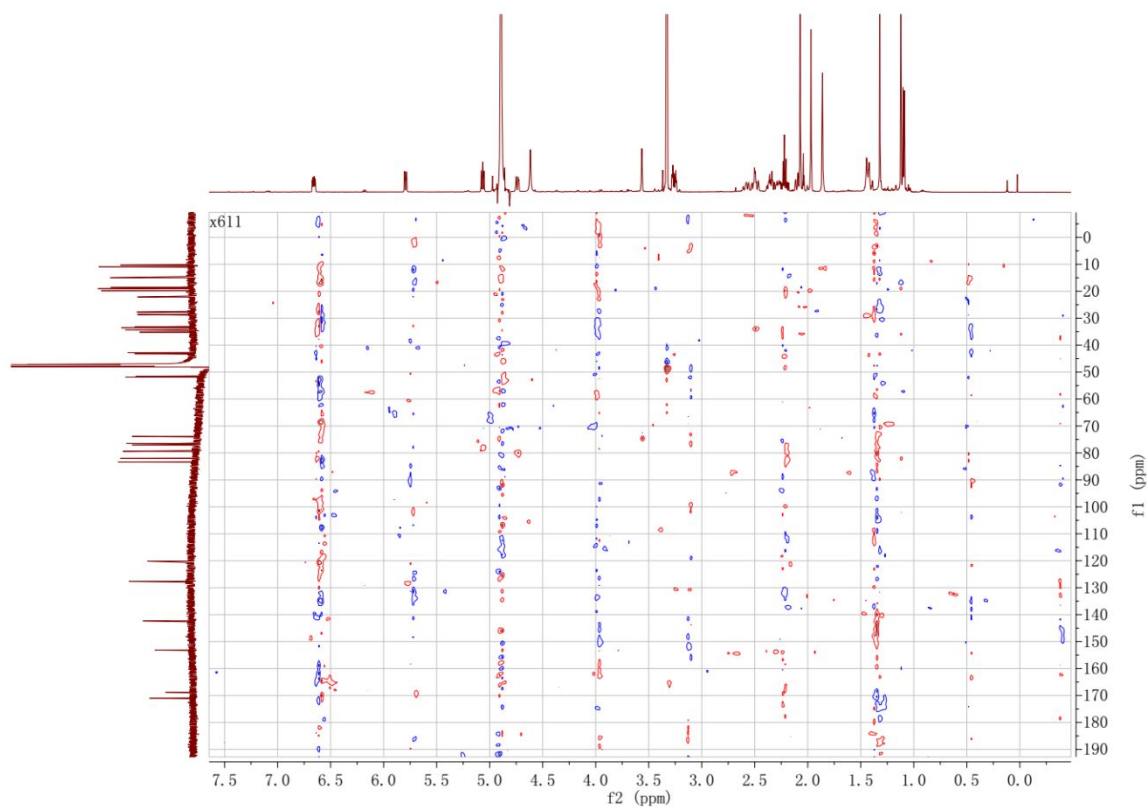

HMBC spectrum of compound **4** in CD<sub>3</sub>OD

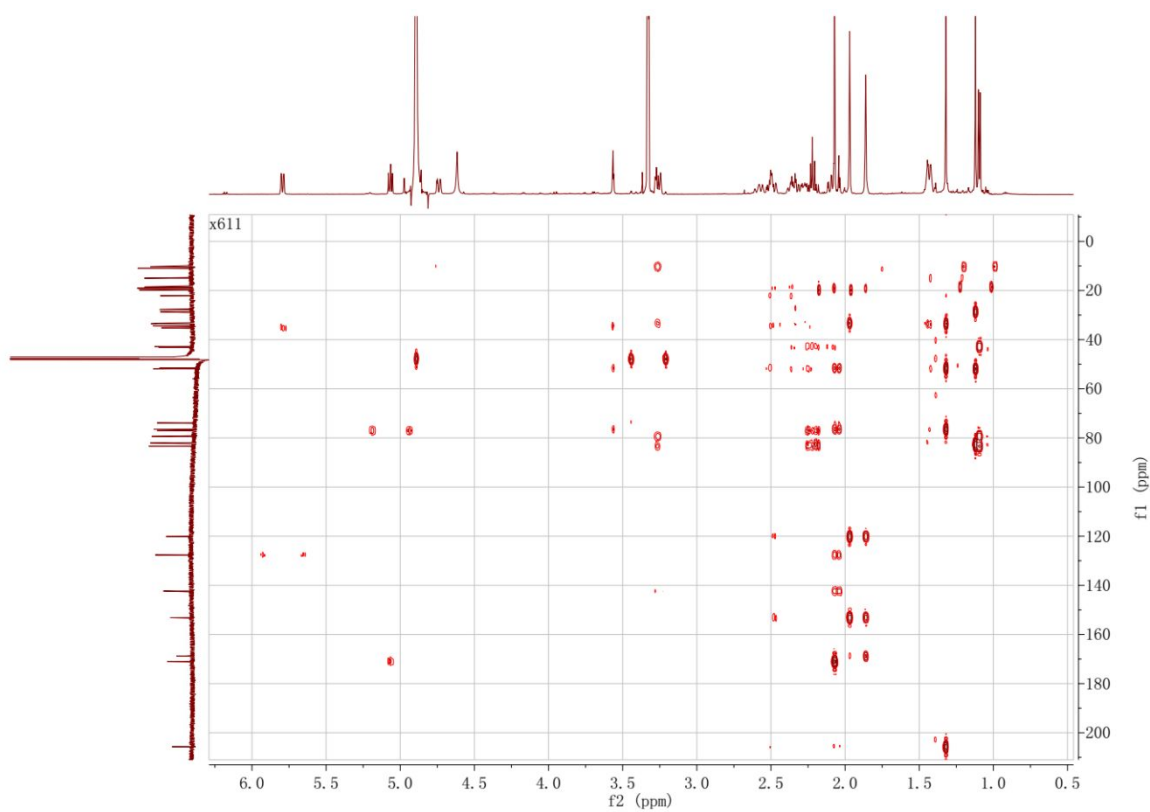

COSY spectrum of compound **4** in CD<sub>3</sub>OD

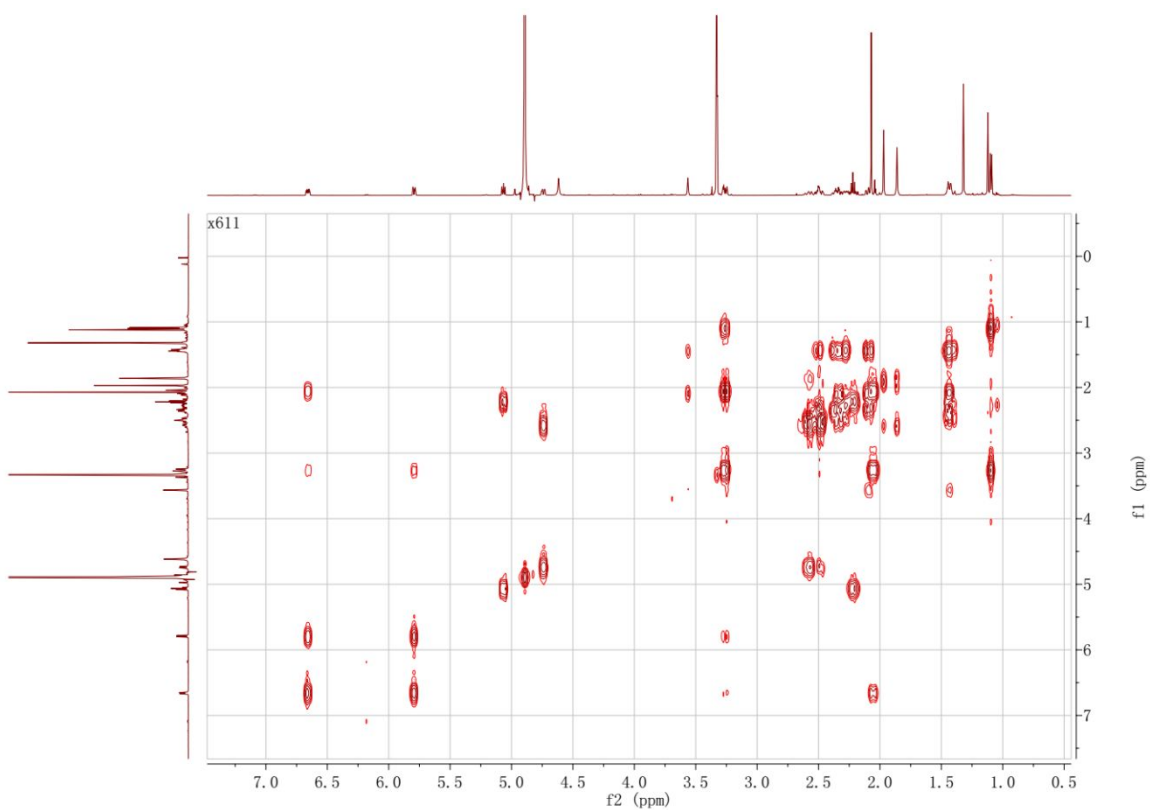

NOESY spectrum of compound **4** in CD<sub>3</sub>OD

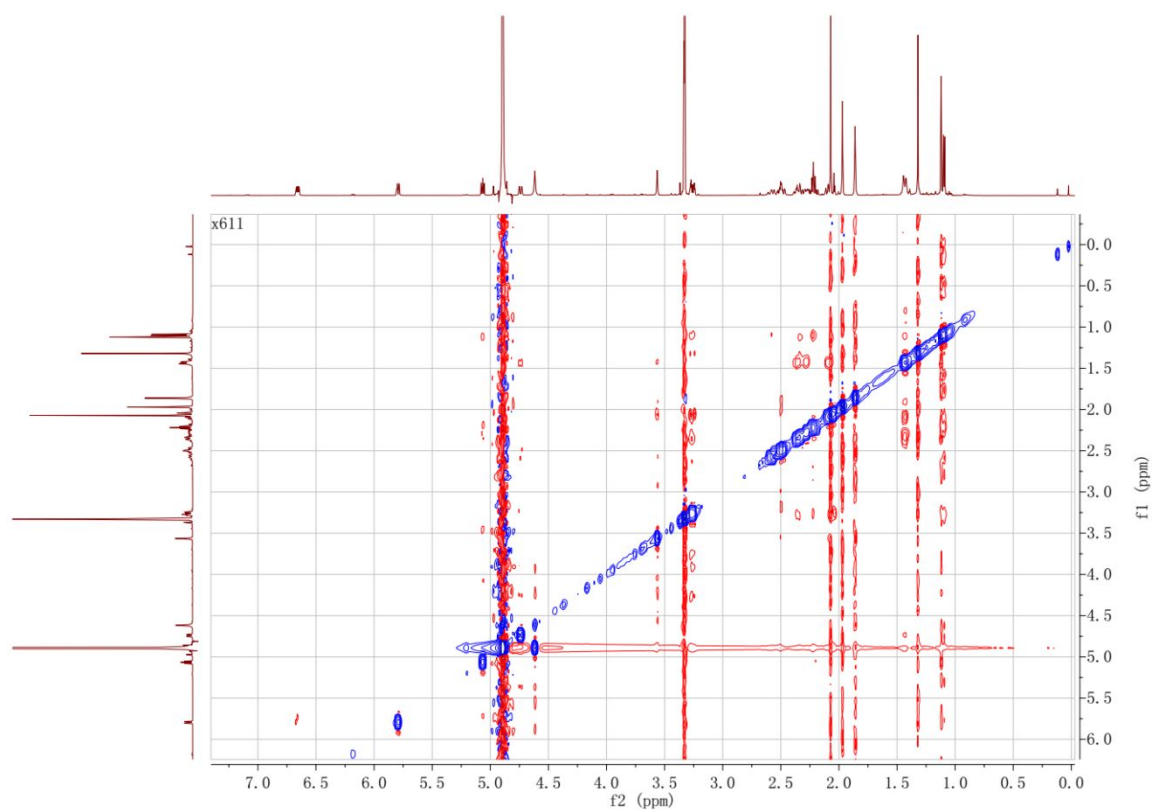

# HR-ESI-MS spectrum of compound 5

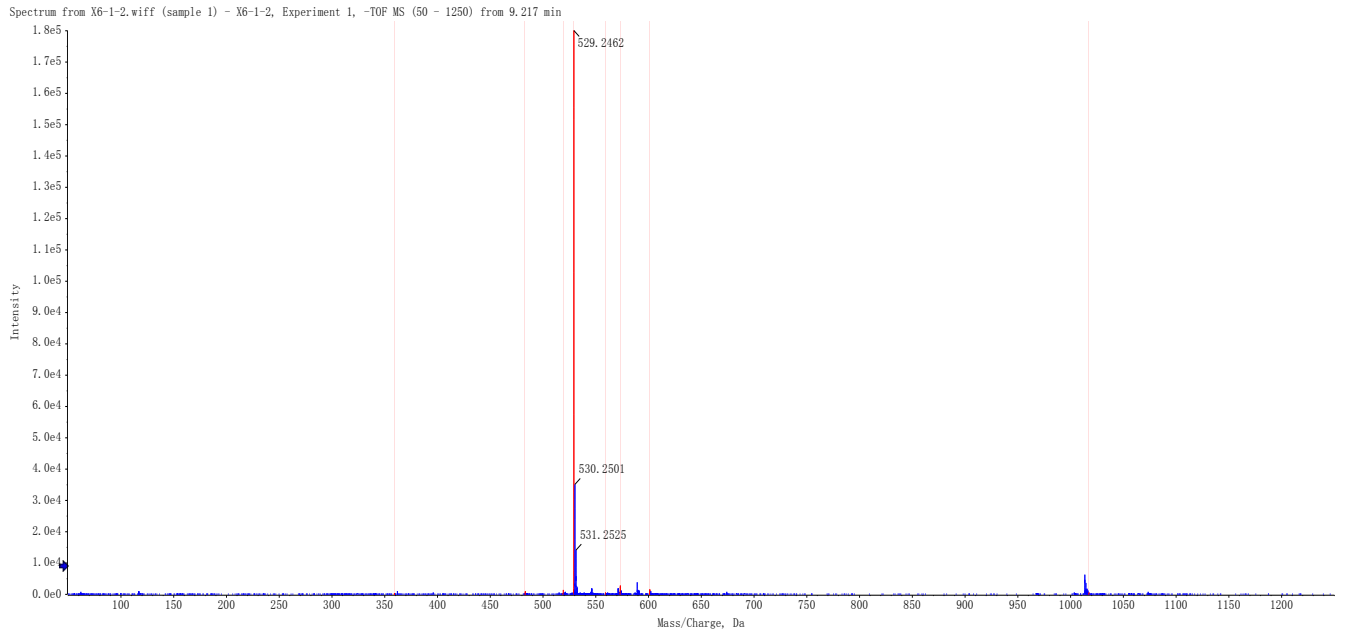

# <sup>1</sup>H NMR spectrum of compound 5 in CD<sub>3</sub>OD at 600 MHz

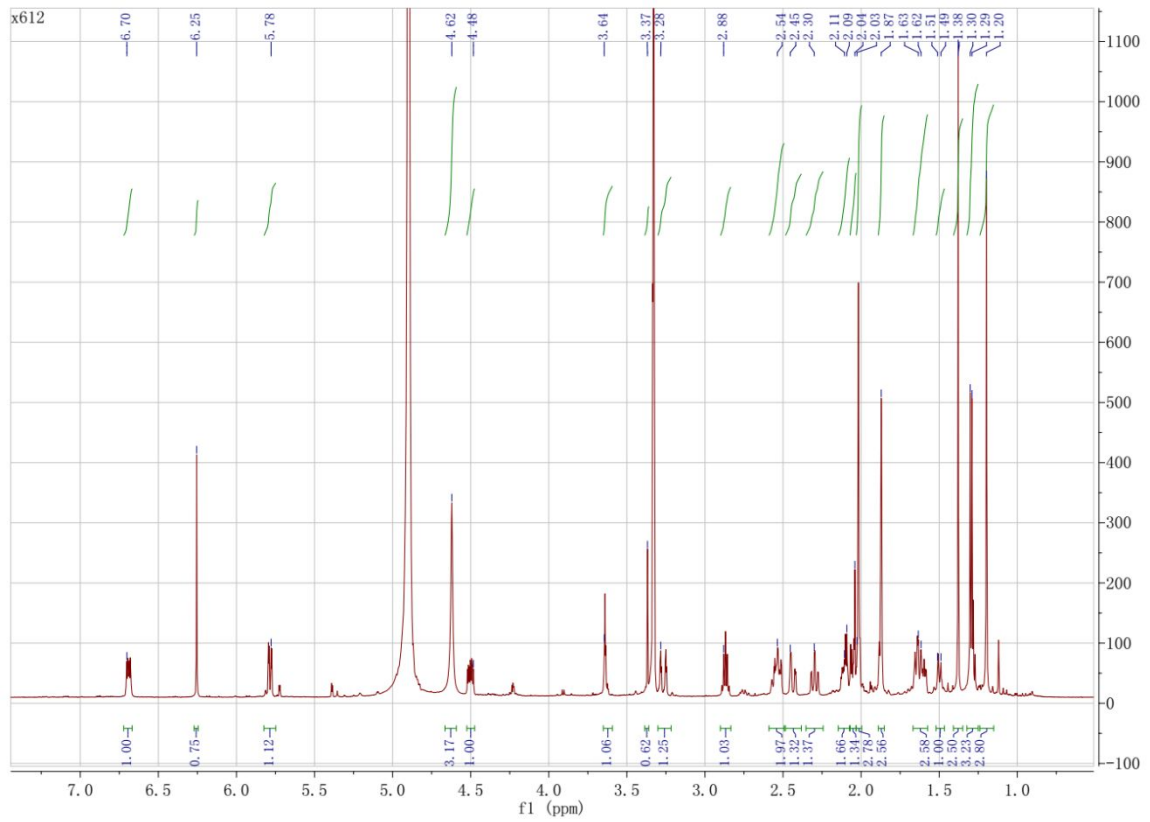

Detailed  $^1\text{H}$  NMR spectrum of compound **5** in  $\text{CD}_3\text{OD}$  at 600 MHz

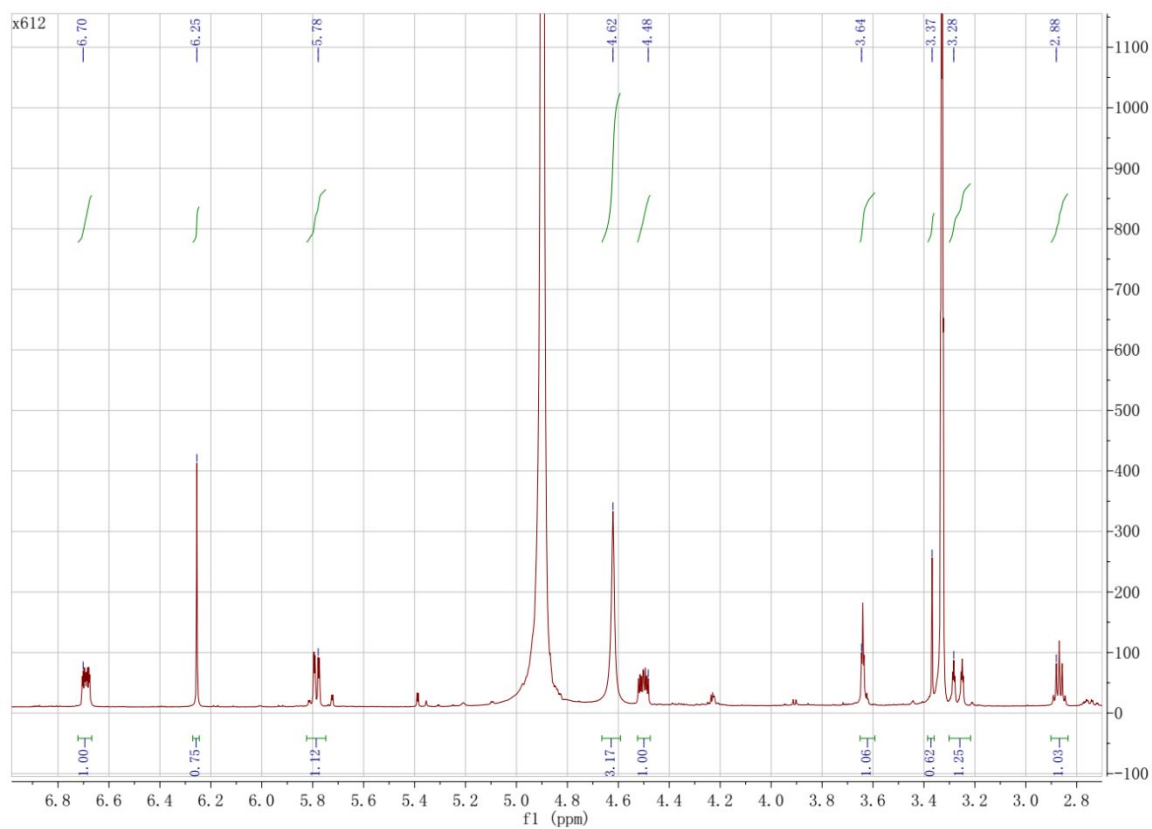

Detailed  $^1\text{H}$  NMR spectrum of compound **5** in  $\text{CD}_3\text{OD}$  at 600 MHz

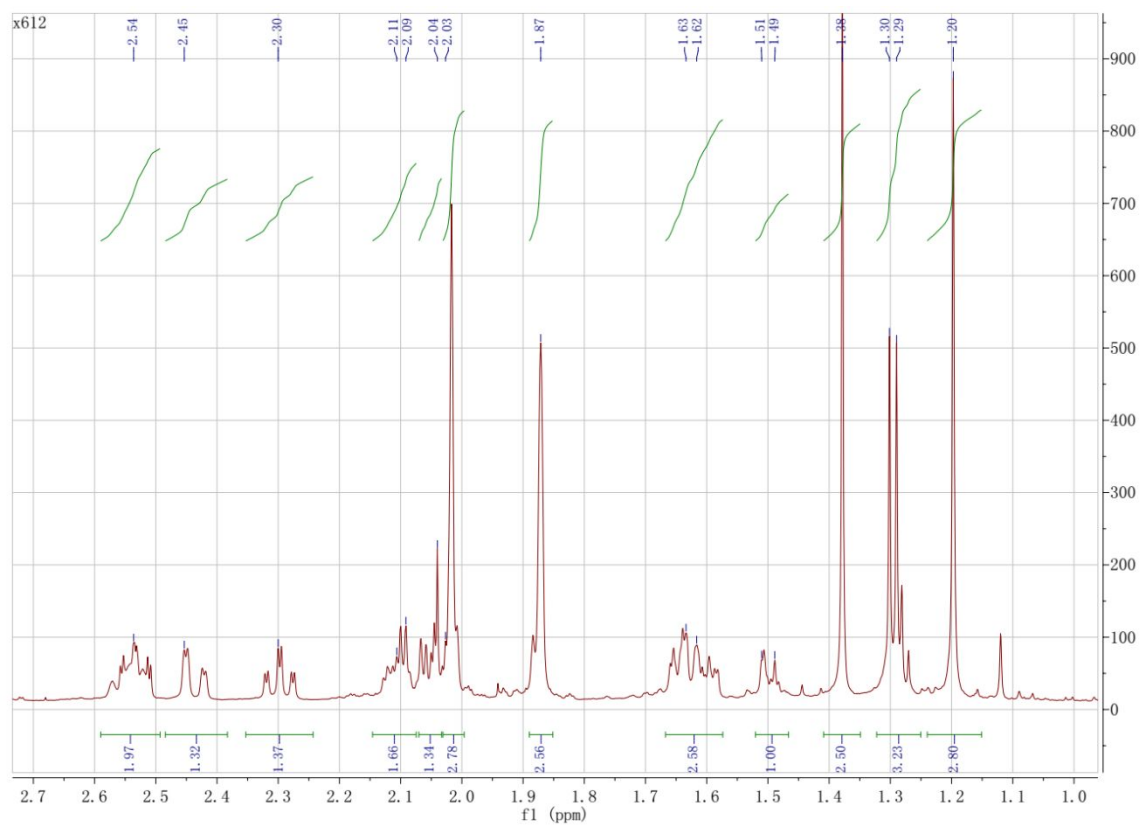



$^{13}\text{C}$  NMR spectrum of compound **5** in  $\text{CD}_3\text{OD}$  at 150 MHz

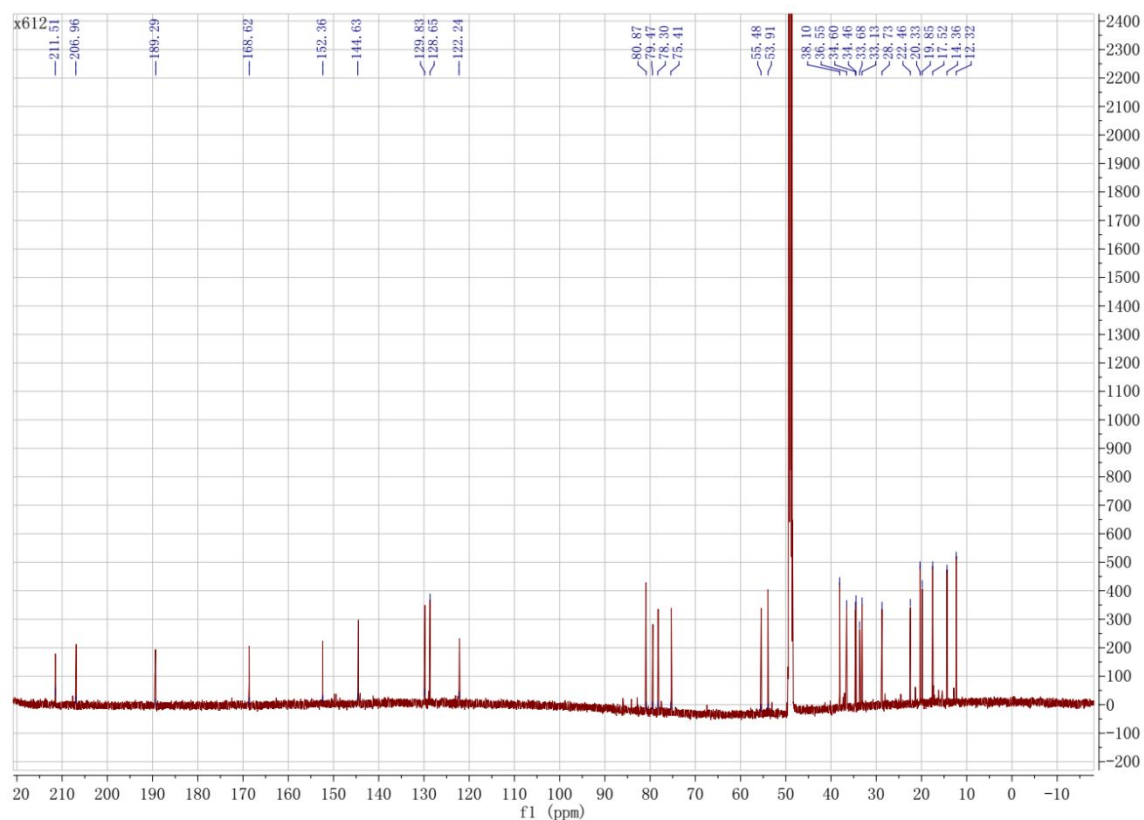

Detailed  $^{13}\text{C}$  NMR spectrum of compound **5** in  $\text{CD}_3\text{OD}$  at 150 MHz

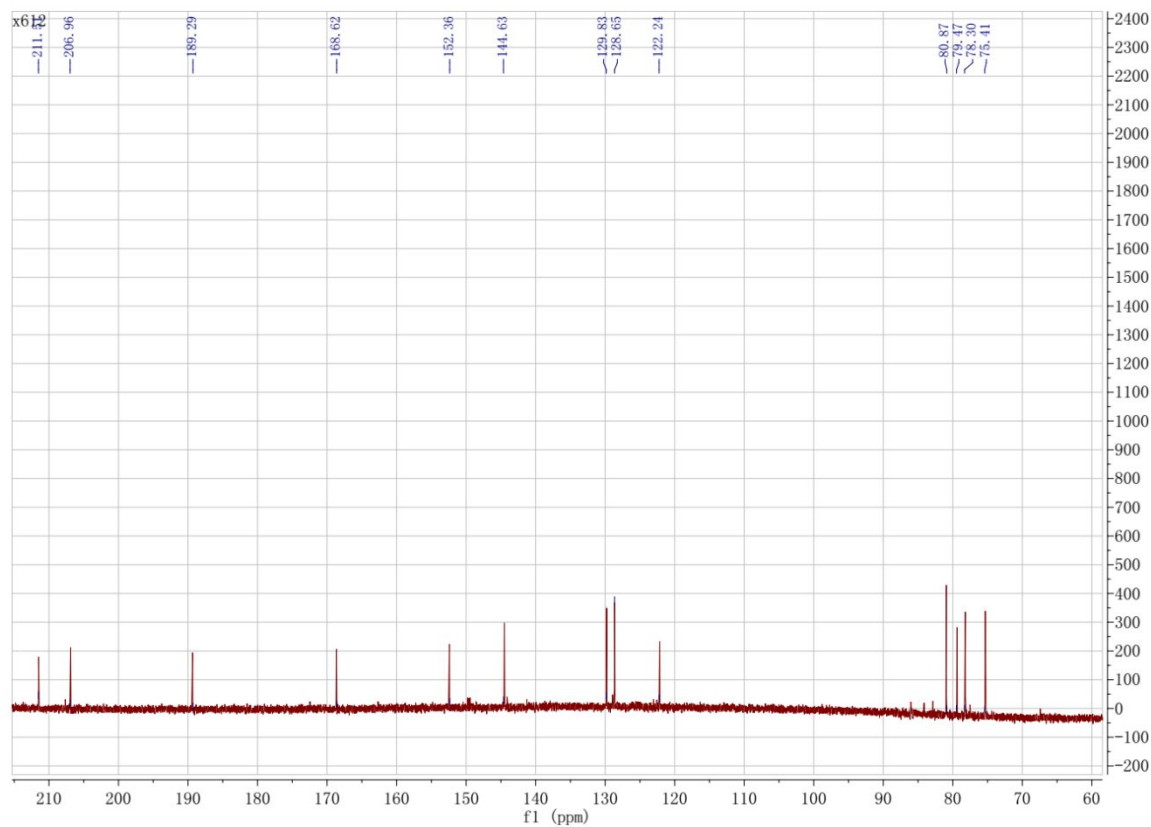

Detailed  $^{13}\text{C}$  NMR spectrum of compound **5** in  $\text{CD}_3\text{OD}$  at 150 MHz

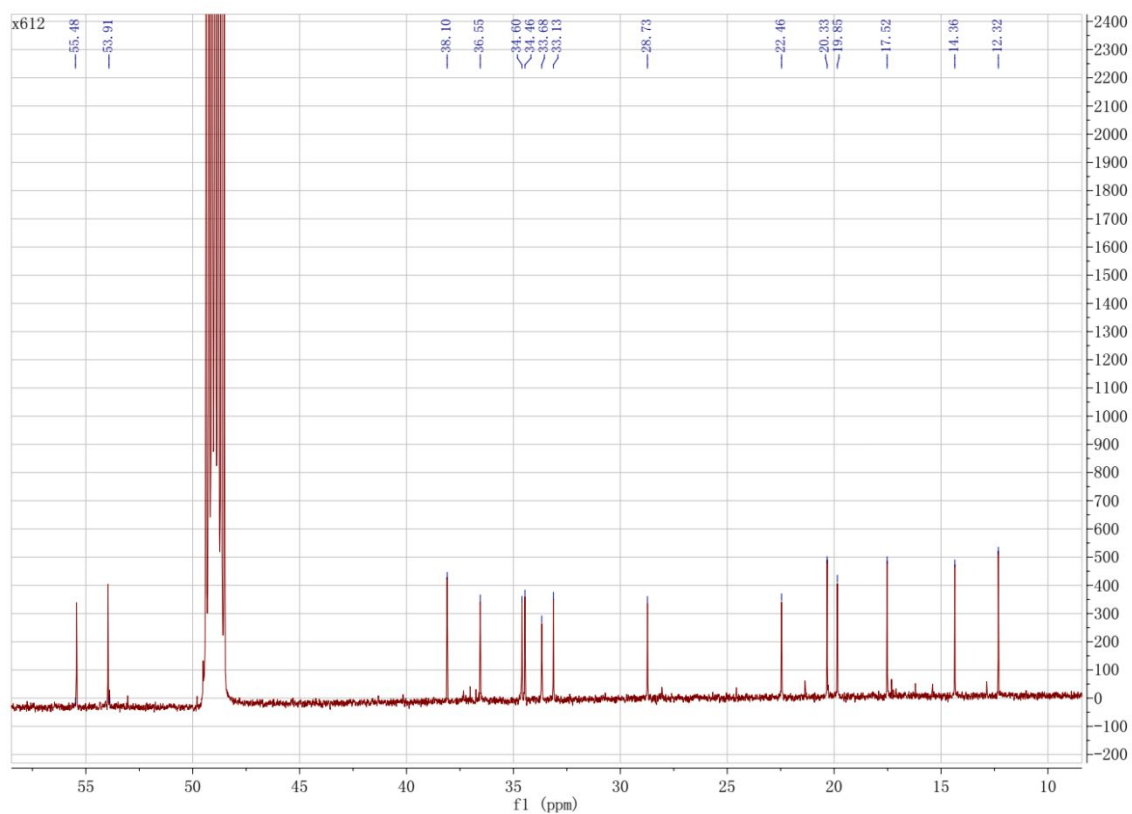

HSQC spectrum of compound **5** in  $\text{CD}_3\text{OD}$

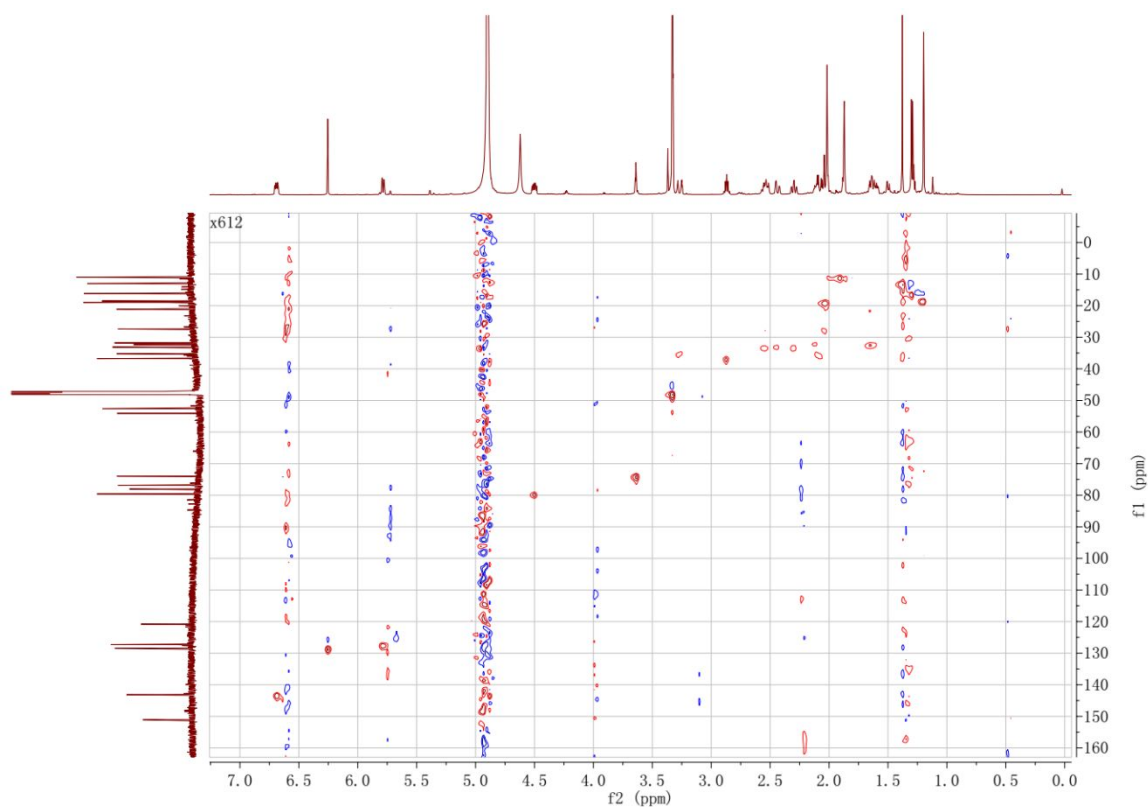

HMBC spectrum of compound **5** in CD<sub>3</sub>OD

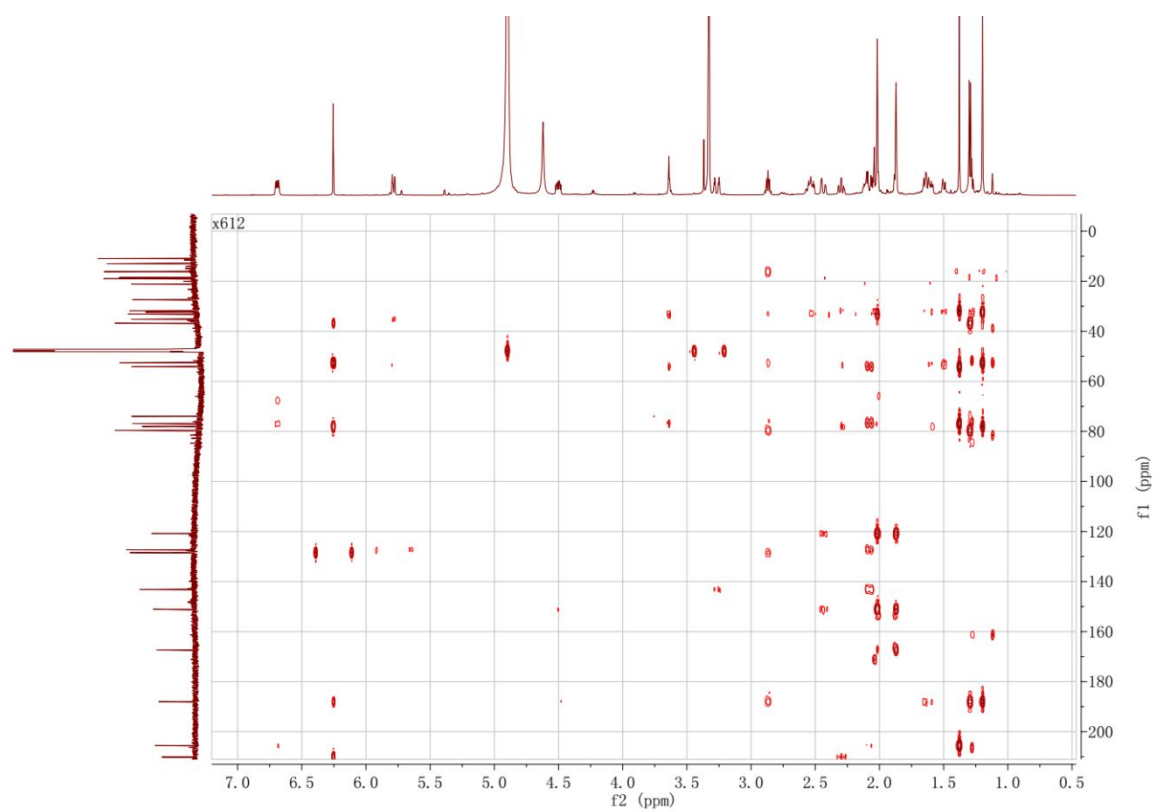

COSY spectrum of compound **5** in CD<sub>3</sub>OD

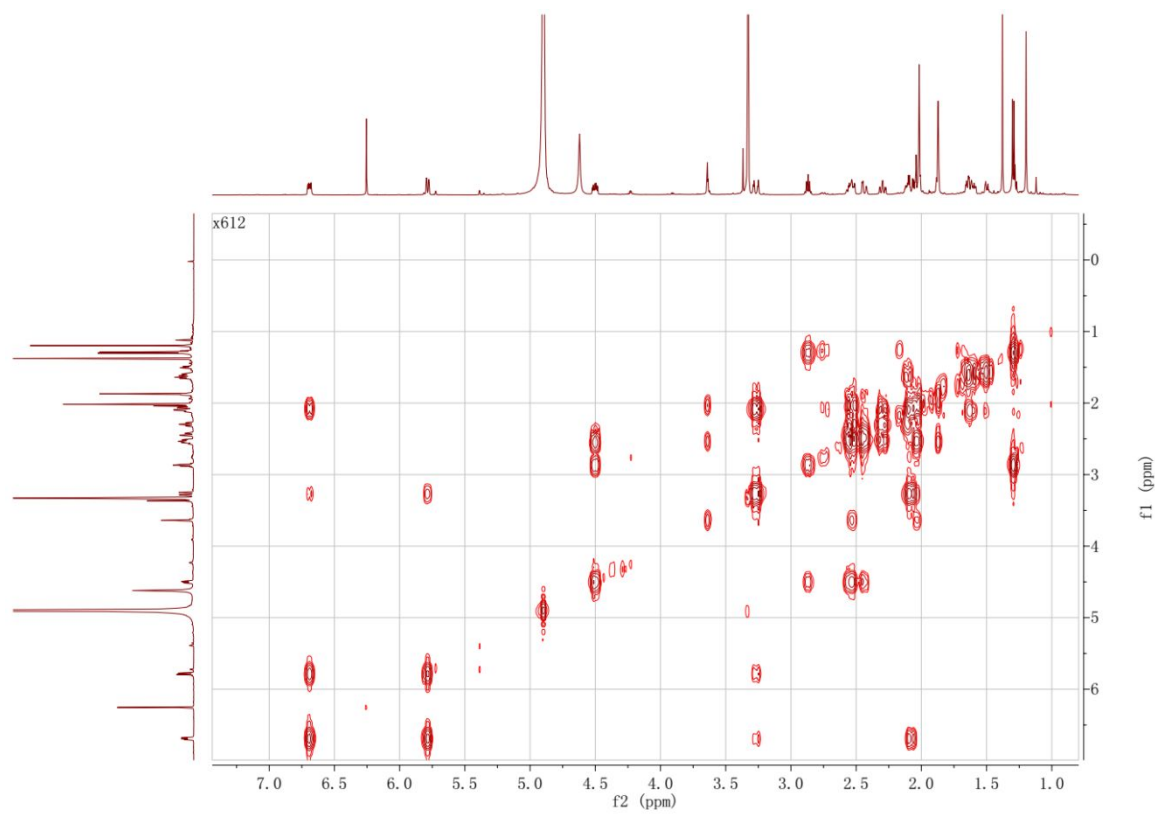

NOESY spectrum of compound **5** in CD<sub>3</sub>OD

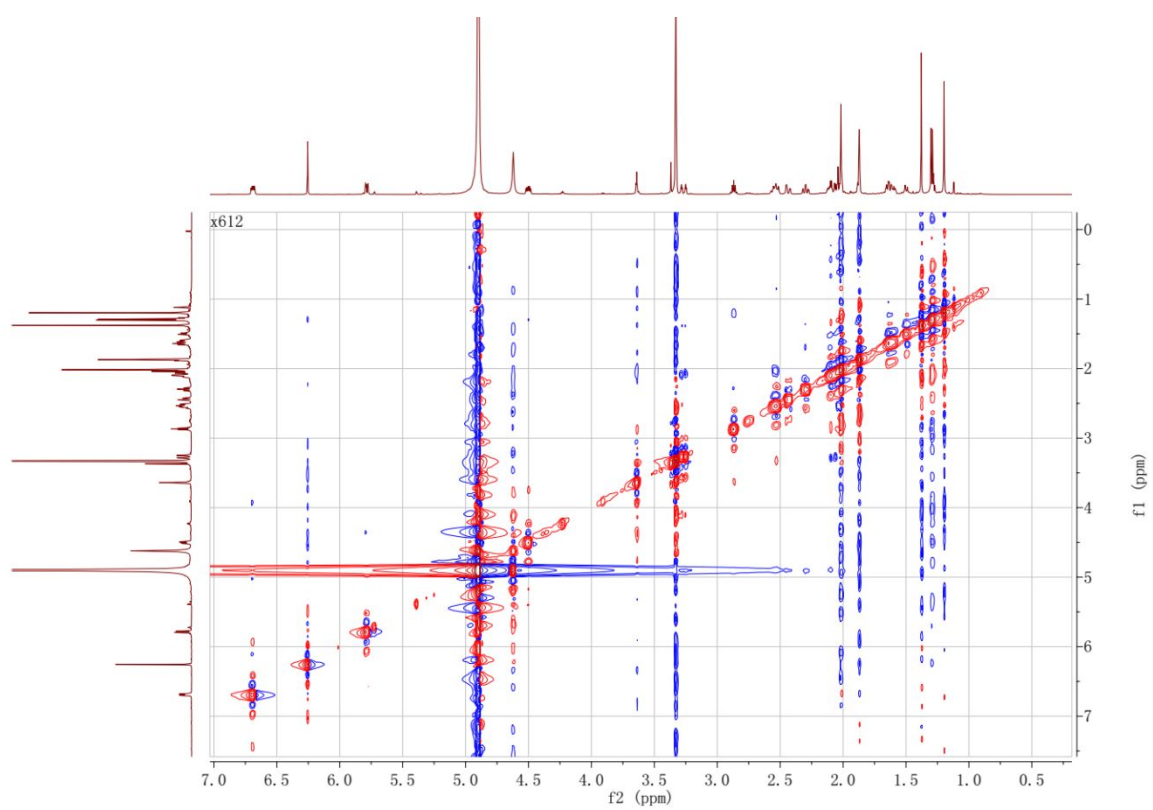

Supplement: ao0c00467_si_001.pdf [file ao0c00467_si_001.pdf]
